# Supplementary material for: Iberulite fall and formation mechanism during a Sahara dust event in Switzerland in February 2021
Source: Copernicus journal article supplement (doi:10.5194/ar-2026-6), 2026-02-04
Supplement: Supplementary file [file ar-2026-6-AC3-supplement.pdf]

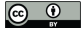

# 1 Iberulite fall and formation mechanism during a Sahara dust event in 2 Switzerland in February 2021

3  
4 Bernard Grobety <sup>1,3</sup>, Philippe Favreau <sup>2</sup>, Juanita Rausch <sup>1</sup>, David Jaramillo <sup>1</sup>, Martin Steinbacher <sup>4</sup>,  
5 Christoph Neururer <sup>3</sup>

6 <sup>1</sup>Particle Vision GmbH, Passage du Cardinal 13B, 1700 Fribourg, Switzerland;  
7 bernard.grobety@unifr.ch, juanita.rausch@particle-vision.ch, david.jaramillo@particle-vision.ch

8 <sup>2</sup>Service de l'air, du bruit et des rayonnements non ionisants (SABRA), Geneva Cantonal Office for the  
9 Environment, 1205, Geneva, Switzerland ; philippe.favreau@etat.ge.ch

10 <sup>3</sup>Geoscience Department, University of Fribourg, Chemin du Muséc 6, 1700, Fribourg, Switzerland;  
11 christoph.neururer@unifr.ch

12 <sup>4</sup>Empa, Laboratory for Air Pollution and Environmental Technology, 8600  
13 Duebendorf, Switzerland; Martin.Steinbacher@empa.ch

14  
15 Correspondence to: Bernard Grobety (bernard.grobety@unifr.ch)  
16

17 **Abstract.** Sahara dust events can promote the formation of micrometer-sized spherical mineral aggregates known as iberulites  
18 as they are usually found on the Iberian Peninsula. Iberulites have not, to our knowledge, been reported from Central Europe.  
19 Two formation mechanisms – in- and ~~below~~-scavenging – have been ~~proposed~~. Strong iberulite fall (IFs) were observed in,  
20 Switzerland in February 2021 when large amounts of dust were transported from the Moroccan-Algerian border towards  
21 Central Europe during a Saharan Dust Event (SDE). In contrast to the previous IFs observed on the Iberian Peninsula, this IF  
22 occurred under low-temperature conditions e.g. near the freezing point in the cloud and at the surface. The relative humidity  
23 in the first 1000 m below the clouds decreased from 70 to 40%. and the comparison between particle-size distribution (PSD)  
24 within the iberulites and the dust PSD in the free atmosphere revealed a Greenfield gap in the iberulites, e.g., a lack of particles  
25 in the range 0.1-0.3 $\mu$ m relative to the dust in the free atmosphere. The meteorological conditions, the microstructure of the  
26 iberulites, and the presence of a Greenfield gap point to below-cloud scavenging as the most likely formation mechanism.  
27 Further discoveries of iberulite in Swiss SDE samples suggest that the phenomenon is widespread and not only limited to  
28 regions close to the dust source.

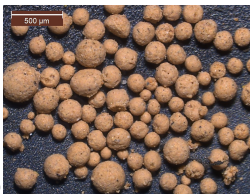

29

Deleted:

Deleted: below

Deleted: given

Deleted: Western

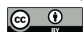

### 301 Introduction

31 Sahara Dust Events (SDEs) occur approximately 10-40 times each year over the Alps, greatly increasing aerosol levels.  
32 They peak from February to June and October to November (Coen et al., 2004; Flentje et al., 2015; Mauro et al., 2019). Since  
33 2020, SDEs in February and March have become more frequent, especially in the Western Euro-Mediterranean region  
34 (Cuevas-Agulló et al., 2024), leading to higher dust concentrations. This trend is driven by westerly wind  
35 blockages shifting poleward due to blocking highs and the development of cutoff subtropical lows. During these  
36 events, aerosol levels often exceed European, Swiss, and WHO PM10 standards (24-hour limit: 50  $\mu\text{g}/\text{m}^3$   
37 (European, Swiss), 45  $\mu\text{g}/\text{m}^3$  (WHO); during events: 55  $\mu\text{g}/\text{m}^3$ ), with ground-level concentrations during the  
38 SDEs exceeding the limits by a factor of 2. Desert dust has been associated with adverse health effects, including  
39 increased cardiovascular mortality and respiratory issues, although impacts vary by the dust's geographic source  
40 (Fussell and Kelly, 2021; Tobias et al., 2019). In Europe, dust accounts for over 40,000 deaths annually (Wang et  
41 al., 2020). To date, 150 countries are affected, with more than 100 classified as non-dust-source regions (Li et  
42 al., 2025). Due to the growing threat of sand and dust storms, international agencies have prioritized mitigation  
43 efforts over the past twenty years (Unccd, 2022). Dust also influences climate and ecosystems (Buseck and  
44 Pósfai, 1999; Lian et al., 2025) by affecting Earth's radiative balance (Heald et al., 2014), degrading air quality  
45 (Proestakis et al., 2025), supplying nutrients to marine and terrestrial ecosystems (Kellogg and Griffin, 2006),  
46 reducing snow and ice albedo to accelerate melting (Francis et al., 2018), and adsorbing trace gases, altering  
47 their physical properties (Tan et al., 2024). Saharan dust notably impacts hail formation in Europe (Brennan and  
48 Wilhelm, 2025). Limited research exists on the economic impact of desert dust, and no standardized data  
49 collection or analysis (Middleton, 2017). Annual dust-related damages in Iraq and Iran are estimated between  
50 \$1.0 billion and \$1.4 billion (Meibodi et al., 2015). In the U.S., costs related to dust and wind erosion reached  
51 \$154 billion in 2017, more than quadrupling since 1995 (Feng et al., 2025).  
52 A distinct type of dust particles are spherule-shaped aggregates measuring between 50 and 200  $\mu\text{m}$ , called iberulites, a term  
53 originating from their first discovery in southern Spain (Díaz-Hernández & Párraga, 2008). Iberulites have also been identified  
54 in Mallorca (Fiol et al., 2005; Fiol & Guijarro, 2000) and in Tenerife (Spain) (Cuadros et al., 2015), but no sightings have  
55 been reported north of 42°N. Iberulites found in Spain display flow textures, including typical depressions (vortices) and a  
56 shell structure with a coarse-grained core and a dense, fine-grained surface layer (Díaz-Hernández & Párraga, 2008; Párraga  
57 et al., 2021). They contain minerals such as silicates, carbonates, sulfates, halides, oxides, and phosphate-vanadates, along  
58 with plant material, silica shells, plankton, and probably viruses. This mineral composition suggests the Sahara and Sahel as  
59 primary mineral sources, while other minerals such as gypsum and alunite-jarosite are likely formed in the atmosphere  
60 (neof ormation), probably via atmospheric pollutants during transport (Díaz-Hernández & Párraga, 2008; Párraga et al., 2021).  
61 Two mechanisms are proposed for creating these aggregates (Díaz-Hernández & Sanchez-Navas, 2016; Párraga et al., 2021):  
62 1. Coalescence of droplets within a cloud increases condensation nuclei within a single droplet, known as in-cloud scavenging

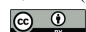

63 (ICS) or 'nucleation scavenging,' and 2. increase in concentration through collisions between particles and falling drops, called  
64 below-cloud scavenging (BCS) or impaction scavenging (Pruppacher & Klett, 2010). The efficiency of a drop in coalescing  
65 or collecting particles is called Number Scavenging Efficiency (NSE) for ICS (Yang et al., 2023), and collection efficiency  
66 (CE) for BCS (Laakso et al., 2003; Slinn, 1977, 1983; Volken & Schumann, 1993). If CE were unaffected by factors such as  
67 drop and particle properties or environmental conditions, the grain-size distribution in iberulite would match the dust-size  
68 distribution in the cloud (ICS) or the volume of air passing through (BCS). However, ICS depends on aerosol activation,  
69 influenced by particle size, composition, coatings, and atmospheric water saturation. Dust particles with soluble coatings are  
70 highly effective cloud condensation nuclei (CCN) (Levin et al., 2005). Small amounts of soluble material greatly increase the  
71 CCN activity of fine dust particles (Kelly et al., 2007). Larger dust particles can act as giant CCN, forming efficient collector  
72 drops (Feingold et al., 1999; Levin & Cotton, 2009). Recent evidence shows insoluble species, such as freshly emitted mineral  
73 dust, can also serve as CCNs, even with little soluble material, especially if they contain soluble ions or have strong water  
74 vapor adsorption on their surfaces (Herich et al., 2009; Koehler et al., 2009; Kumar et al., 2009). Mineral dust's contribution  
75 to CCN levels decreases at lower supersaturations because insoluble aerosols are less hygroscopic and need higher  
76 supersaturation to activate compared to soluble particles. Nonetheless, since dust particles are coarser, coated particles can  
77 activate at lower supersaturations than smaller human-made aerosols. At 0.2% supersaturation, mineral dust accounts for up  
78 to 30% of CCN, increasing to 35% at 0.4%. NSE, or water adsorption efficiency, varies with particle type, size, and  
79 supersaturation. For dust particles between 0.3 and 1  $\mu\text{m}$ , NSE remains around 0.2 (Yang et al., 2023). For particles larger  
80 than 1.0  $\mu\text{m}$ , NSE increases, whereas particles between 0.1 and 0.3  $\mu\text{m}$  are often removed by impaction, reducing NSE to  
81 about 0.1. For BCS, the capture efficiency depends on particle size and the capture mechanism. If the drop with a radius  $R$   
82 falls vertically, e.g., no deviation by wind, the maximum number of possible collisions  $N$  along a trajectory  $l$  within the dust  
83 layer with particle radius  $r$ , mass density  $M_d$ , and particle density  $d$  can be calculated.

$$84 \quad N = \frac{3}{4} \frac{2\pi M_d R^2 l}{\pi r^2 d} \quad (1)$$

85 For particles larger than 1  $\mu\text{m}$  in diameter colliding head-on with a droplet, bouncing is unlikely, and the sticking efficiency  
86 is assumed to be 100%. However, for particles with radii between 0.3  $\mu\text{m}$  and 1  $\mu\text{m}$ , the CE, which is defined as the ratio of  
87 the total number of collisions given by eq. 1 to the number of particles captured by the droplet, is less than 1. This occurs  
88 because of the airflow around the falling droplet. Particles in this size range, although on collision trajectories, tend to follow  
89 the flow lines and are diverted around the droplet. Larger particles, due to their inertia, cross the flow lines and impact the  
90 droplet directly, resulting in a CE of 1 (capture by impaction). Small particles ( $< 0.3 \mu\text{m}$ ) that follow the flow lines may be  
91 pushed by Brownian motion into the droplet's wake and deposited on its rear end (Brownian capture), making the CE also  
92 close to 1. Capture can also occur through thermophoretic and diffusiophoretic forces. Thermophoretic forces push aerosol  
93 particles toward a frozen drop during evaporation and away from it during vapor deposition. During diffusive crystal growth,  
94 a flow known as Stefan's flow exists near the hydrometeor surface, exerting a force on nearby aerosol particles that pulls them  
95 toward the surface. Particles, regardless of their size, can follow flow lines, but at some point, these lines get closer to the

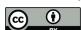

96 droplet's surface than the particle's radius. The particle then contacts the droplet's surface and sticks to it (capture by  
97 interception). This process has a relatively low capture efficiency. For particles with radii between 0.3 and 1.0  $\mu\text{m}$ , none of  
98 the preferred capture processes are effective, and the CE decreases by two orders of magnitude. This reduction in CE was first  
99 described by Greenfield (1957), and the absence of particles in the 0.3–1.0  $\mu\text{m}$  range is called the Greenfield gap. Both  
100 formation mechanisms lead to a depletion of particles in the 0.3–1.0  $\mu\text{m}$  range in the iberulites relative to the dust  
101 cloud concentration, but the decrease is much more pronounced for BCS. The particle size distribution (PSD) inside an  
102 iberulite, compared to the PSD in the free atmosphere, can therefore indicate the formation mechanism of the iberulite.  
103 Dust from potential source areas has been characterized by bulk chemistry and mineralogy (Kandler et al., 2007; Scheuvers  
104 et al., 2013). Mineralogical fingerprints include phyllosilicates, such as the ratio of illite to kaolinite concentrations (I/K)  
105 (Caquineau et al., 1998; Chester and Johnson, 1971; Scheuvers et al., 2013). The general trends in Northern Africa show increases  
106 in I/K from south to north and from east to west. High carbonate contents (>10 wt.%, calcite > dolomite) also serve as a  
107 fingerprint of dust from northwestern Africa (Avila et al., 1997). Similar to illite, carbonate content decreases steadily  
108 toward the south (Paquet, 1984). The high carbonate content of dust emitted from the northern regions within and near the  
109 Atlas Mountains reflects the geology of those areas (Grousset et al., 1992).  
110 A major SDE struck Switzerland on the afternoon of February 6th, 2021, making it one of the strongest since systematic  
111 monitoring began in 2001 (Collaud Coen et al., 2025) at the Jungfraujoch laboratory (JFJ, inlet altitude 3585 m above sea  
112 level). Due to its elevation and low local emissions, JFJ is ideal for studying long-range transport processes. A record  
113 PM10 concentration exceeding 700  $\mu\text{g}/\text{m}^3$  was recorded (NABEL, BAFU/Empa). The iberulite fall (IF) was observed by  
114 the authors in Saint-Légier (Vaud), Fribourg (Fribourg), and Geneva. This study aims to characterize the collected  
115 iberulites and examine the aggregation mechanism in detail, using well-documented meteorological conditions during the  
116 fall.

**Commented [JRI]:** Probably not only in those locations. But observed by us. Therefore, I suggest to add "by the authors"

**Deleted:** <#>Sahara Dust Events (SDEs) reach about 10–40 t and significantly contribute to the aerosol<sup>†</sup> load above the region, with strongest influence from February–November (Coen et al., 2004; Collaud<sup>†</sup> Coen et al., 2025; Mauro et al., 2019; Flentje et al., 2015). SD particularly increased since 2020<sup>†</sup> (Cuevas-Agulló et al., 2024). Aerosol concentrations during t European and Swiss air quality<sup>†</sup> standards and the WHO PM10 air quality guidelines. There is human health, e.g., increases<sup>†</sup> in cardiovascular mortality and respiratory morbidity, but the when considering the dust's<sup>†</sup> geographical origin (Fussell and Kelly, 2021; Tobias et al., 20 ecosystems (Buseck and<sup>†</sup> Pósfai, 1999; Parajuli et al., 2022). Although the importance of mineralogical studies are scarce<sup>†</sup> (Engelbrecht and Derbyshire, 2010).<sup>†</sup> A special form of dust aerosol particles are giant spherule-sha 200  $\mu\text{m}$  in diameter. These<sup>†</sup> "microspherulites" are called iberulites, in reference to their f (Díaz-Hernández and Párraga,<sup>†</sup> 2008). Such iberulites were also reported from Mallorca (Spa Tenerife (Spain) (Cuadros et al.,<sup>†</sup> 2015), but no observations have been reported from regions N are thought to form inside<sup>†</sup> raindrops by the coalescence of smaller droplets in a cloud, th condensation nuclei in the latter,<sup>†</sup> or by the capture of particles below a cloud by drops as they f (Díaz-Hernández and Párraga, 2008). A major<sup>†</sup> SDE hit Switzerland at the beginning of February 2021. Syste conducted in Switzerland at the<sup>†</sup> Jungfraujoch Sphinx observatory (inlet altitude 3585 m above 2020)) since 2001 (Collaud Coen<sup>†</sup> et al., 2025). Due to its elevation and the negligible local emis location to investigate long-<sup>†</sup> range transport processes (Herrmann et al., 2015). The event of one of the strongest SDEs since<sup>†</sup> its systematic monitoring in 2001 (Collaud Coen et al., 2025). February 6th, 2021 in the afternoon.<sup>†</sup> At Jungfraujoch, a record PM10 concentration of more than 7 (NABEL, BAFU/Empa). The IF<sup>†</sup> analyzed here happened at lower altitudes in the village of Sa 46.471° N, 6.877° E), the city of<sup>†</sup> Fribourg (canton of Fribourg, 46.717° N 7.083° E), and the ci 46.033° N, 6.117° E), all in<sup>†</sup> western Switzerland. Until now, two formation processes of i and below-cloud scavenging.<sup>†</sup> The goal of the present work is to explore the aggregation me leveraging the well-documented<sup>†</sup> meteorological conditions during the fall in our case.<sup>†</sup>

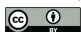

**2 Methods**

**2.1 Iberulite collection**

The fall of the Iberulites was observed in the early afternoon of February 6th in St. L gier (46.471  N, 6.877  E), Fribourg (46.717  N, 7.083  E), and Geneva (46.204  N, 6.143  E) (Fig. 1, Table 1). Iberulites were collected in all three sites. The city of Fribourg (500-700 m ASL) is 50 km NNE of Lake Geneva on the Swiss plateau, and the village of St. L gier (576 m ASL) is on the central northern shore of the same lake. The geology of the surroundings of both sites is Collecting dust on aluminum foil is not a common method, but since the IF was unexpected, standard sampling equipment, such as a sampling head with an impactor and a pump, could not be set up in time. Aluminum foils are used to collect interstellar dust (Kearsley et al., 2010) and to identify laboratory sources of microplastic and nanoplastic contamination (Jones et al., 2024). Loss of particles during dispersal on the foil is negligible.

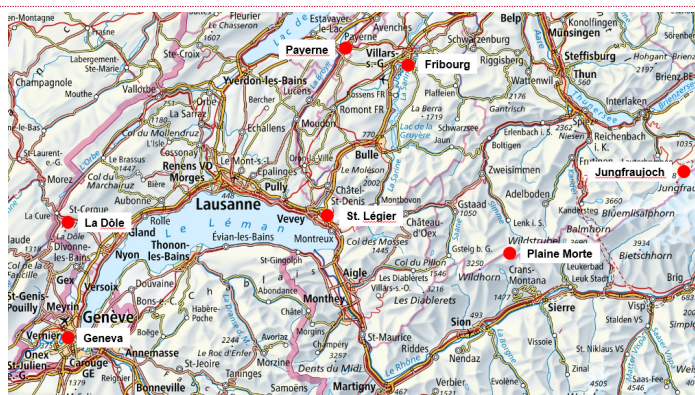

Figure 1. Locations in Western Switzerland mentioned in the text (Swisstopo, 2025).

Table 1 Sampling sites and analyses done (iber.: iberulite; opt.: binocular imaging)

| Site         | Sampling | Dust PSD | Iber. PSD | Dust XRD | Dust SEM | Iber. Opt. | Meteo |
|--------------|----------|----------|-----------|----------|----------|------------|-------|
| Fribourg     |          |          |           |          |          |            |       |
| St. L gier   |          |          |           |          |          |            |       |
| Gen ve       |          |          |           |          |          |            |       |
| Jungfraujoch |          |          |           |          |          |            |       |
| Payerne      |          |          |           |          |          |            |       |

Deleted: Collection sites

Deleted: on

Deleted: from all three sites

Deleted: St. L gier, Fribourg, and Geneva (Switzerland).

Deleted:

Deleted: dominated by calcareous mountains (Jura, Pr alpes) 2011). In St. L gier, the iberulites were picked up from the ground with tweezers, and in Fribourg, an ground, from which samples were collected with a fine spatula. The iberulites were gently deposited on head specimen mounts and boron substrates (see below).

Deleted: The high-Alpine station Jungfraujoch (7.98  N, northern Swiss Alps. Its remote location, far from local anthropogenic sources, makes it ideally suited for atmospheric conditions over central Europe. Jungfraujoch hosts a comprehensive long-term in-situ and trace gas as a contribution to the Global Atmosphere Watch (GAW) program of the World Meteorological Organization (WMO) (Bukowiecki et al., 2016) and is part of the Swiss National Air Pollution Monitoring Network.

Deleted: .

Deleted: .

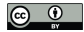

129

## 130 2.1 Meteorological data

131 Meteorological data were obtained from radio sounding balloons, which are launched by the Federal Office for Meteorology  
132 and Climatology of Switzerland (MeteoSwiss) station in Payerne (46.817° N, 6.933° E), twice a day (23:00 and 11:00 h UTC).  
133 Payerne is located 17 km west and 47 km north of the collection sites in Fribourg and St. Léger, respectively. The station is  
134 equipped with a Raman lidar, ceilometers, and a Doppler radar to measure precipitation, aerosol concentration, and wind  
135 profiles. On February 6th, the ceilometer profile series from Payerne exhibited gaps in the morning and smaller ones in the  
136 afternoon due to ground fog. The area is also covered by two weather radars: one on La Dole Mountain (46.425°N, 6.099°E),  
137 west of St. Léger and near Geneva, and the other on the Plaine Morte (46.383°N, 7.500°E), in the central Bernese Alps  
138 southeast of the two collection sites.

139 The size distributions of fine- and coarse-mode aerosols in the dust cloud were measured at the high-altitude Alpine station  
140 Jungfraujoch (JFJ, 7.98° N, 46.55° E; 3580 m ASL, Fig. 1), located in the Bernese Alps. Its remote location, far from local  
141 human sources, makes it ideal for monitoring background atmospheric conditions over central Europe. Jungfraujoch hosts a  
142 comprehensive long-term in situ monitoring program for aerosols and trace gases as part of the Global Atmosphere Watch  
143 (GAW) program of the World Meteorological Organization (WMO) (Bukowiecki et al., 2016), and is included in the Swiss  
144 National Air Pollution Monitoring Network (Hüglin, 2021). Aerosol measurements have been conducted using a custom-  
145 built Scanning Mobility Particle Size Spectrometer (SMPS) (Wiedensohler et al., 2012; Jurányi et al., 2011) and a white-  
146 light optical particle size spectrometer (FIDAS, Palas GmbH, Germany)(Brem et al., 2023)(Fischer and Hüglin, 2024).

## 147 2.3 Dust trajectory analysis

148 The dust RGB product, based on three infrared channels of the Spinning Enhanced Visible and InfraRed Imager (SEVIRI) on  
149 EUMETSAT's MSG-11 satellite (Schmetz et al., 2002), was used to identify the sources of afternoon dust arriving over  
150 western Switzerland (Schepanski et al., 2009). The dust detection method relies on the brightness temperature differences at  
151 12.0 μm minus 10.8 μm and 10.8 μm minus 8.7 μm, as well as at 10.8 μm (Sokolik, 2002). The plume's path was tracked  
152 using satellite images following the approach described by (Ashpole and Washington, 2013). The visually determined dust  
153 trajectories were verified by both forward and backward trajectory calculations using the Hybrid-Single Particle  
154 Lagrangian Integrated Trajectory (HYSPLIT) model developed by the National Oceanic and Atmospheric Administration's  
155 (NOAA) Air Resources Laboratory (ARL) (Draxler and Rolph, 2003).

Deleted: The size distributions of fine-mode and coarse-mode measured by a home-built Scanning Mobility Particle Size Spectrometer (SMPS) (Wiedensohler et al., 2012 white-light optical particle size

Deleted: <#>spectrometer (FIDAS, Palas GmbH, Germany) (respectively.

Deleted: (<https://www.eumetsat.int/0-degree-service>).

Deleted: determine the origin of the dust arriving in the afternoon over western Switzerland. The plume

Deleted: traced on satellite images using the approach

Deleted: ¶

Moved (insertion) [1]

Deleted: ¶

Deleted: ¶



156 HYSPLIT uses archived 3-dimensional meteorological fields generated from ground and satellite observations,  
157 as well as short-term forecasts. or this study, the Global Forecast System dataset from the  
158 National Centers for Environmental Prediction at a 0.25° resolution was employed for back-trajectory calculations. The  
159 SERVIRI images and the backward trajectories trace the dust's origin for an arriving time over Fribourg at 2000 meters  
160 above ground level (AGL), between 12:00 and 18:00 UTC on February 6, roughly coinciding with the period of highest  
161 cloud density) to the Algerian - Moroccan border. The dust source meteorological data were obtained via the Real-time  
162 Environmental Applications and Display sYstem (READY) from the archived Global Data Assimilation System (GDAS)  
163 (Rolph et al., 2017). The data were obtained for the center of the primary dust source observed in the satellite image, e.g.,  
164 33.8°N, 1.5°W.

#### 165 2.4 Scanning Electron Microscopy (SEM) and Optical Polarization Microscopy (OPM) analyses

166 Single particles and iberulites were isolated from samples collected on the ground in St. Legier and Geneva, as well as on  
167 an aluminum foil in Fribourg. A selection of iberulites was gently placed onto a 1/2" pin stub mount (Ted Pella, Redding, CA,  
168 USA) and examined using an Olympus SZX12 binocular microscope (Tokyo, Japan). All single particles collected on the  
169 foil in Fribourg were dispersed onto a carbon pad covered 1-inch pin stub and analyzed using automated SEM/EDX single-  
170 particle analysis (Computer-Controlled SEM, CCSEM). During CCSEM, particles are identified based on their Back-  
171 Scattered Electron (BSE) contrast, and images, along with Energy-Dispersive X-ray (EDX) spectra, are acquired. For this, a  
172 FEI Sirion FEG microscope equipped with an Oxford X-MAX EDX detector with a 150 mm<sup>2</sup> sensor size, a four-quadrant  
173 BSE detector, and AZtecFeature software (Oxford Instruments) was used at the Department of Geoscience of the University  
174 of Fribourg (Fribourg, Switzerland). The analyses were performed at 20 kV. EDX analyses were performed for each  
175 recognized particle. The AZtec software automatically applied a "ZAF" correction (PAP version of the f(pz) formalism  
176 (Pouchou and Pichoir, 1985)—considering atomic number (Z), absorption (A), and fluorescence (F)—to the raw data for  
177 elemental concentrations. Quantification was based on factory-delivered standard measurements. The ZAF correction  
178 assumes homogeneous samples with smooth surfaces perpendicular to the beam and thicknesses greater than the excitation  
179 volume—conditions not met by these particles due to their rough surfaces and small sizes. However, studies (Weinbruch et  
180 al., 1997; Meier et al., 2018; Kandler et al., 2018) have shown that for particles larger than 1 μm in diameter, the relative  
181 standard deviation of corrected concentrations of major elements is approximately 2%. For minor elements, the  
182 deviation is is higher. Since only particles with diameters > 1 μm in diameter were included in further data processing,  
183 the ZAF-corrected concentrations values were used without additional corrections. The standard deviation in ZAF-corrected  
184 concentrations measured in particles increases proportionally with the acceleration voltage (equivalent to increasing  
185 excitation volume). Several blank analyses of empty substrates have shown that under the applied analytical conditions, the  
186 substrate surface contains, in an area of ca. 1 mm<sup>2</sup>, a maximum of five particles on unexposed substrates. These particles are

Moved up [1]: <#> developed by the National Oceanic and Atmospheric Administration (NOAA) Air Resources Laboratory (ARL) (Draxler and Rolph, 2003).

Deleted: se

Deleted: The forward calculations started from a point within satellite images.

Deleted: ¶

Deleted: ¶

Deleted: 3

Deleted: separated from bulk samples using an Olympus SZX

Deleted: previously coated with 12 mm Pelco tabs (Ted Pella, Redding, CA, USA) boron substrates. The latter were used to improve the contrast of low-atomic-number particles, sample (area depending on particle load on the sample surface) was

Deleted: also known as

Deleted: Zeiss Gemini 300 Field Emission Gun (FEG)-SEM

Deleted: n

Deleted: 80

Deleted: window

Deleted: Particle Vision

Deleted: For this purpose, a Zeiss Gemini 300 Field Emission an Oxford X-MAX EDS detector with an 80 mm<sup>2</sup> window, a high-efficiency Electron (BSE) detector, and the particle analysis software included in AZtecFeature (Oxford Instruments) was used.

Deleted: A

Deleted: (A),

Moved down [2]: The ZAF procedure is valid only for homogeneous surfaces perpendicular to the beam and considerably thicker than the excitation volume. Neither our case. However, several authors (Weinbruch et al., 1997; Meier et al., 2018; Kandler et al., 2018) have shown that for particles larger than 1 μm in diameter, the ZAF correction is valid for particles and considerably thicker than the excitation volume. Neither our case.

Deleted: was applied automatically by the AZtec software [1]

Moved (insertion) [2]

Deleted: diameterThe ZAF procedure is valid only for [2]

Deleted: ¶

Deleted: In contrast,

Deleted: considerably larger (Kandler et al., 2018)

Deleted: retained

Deleted: ¶

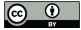

187 organic in nature and most likely follicles.

## 188 2.5 Particle size and microstructure analysis

189 Images obtained from both the optical microscope and the SEM were used to characterize the particle-size distribution of  
190 the total dust and iberulites, as well as their microstructure, using Avizo software (Thermo Fisher). The selected iberulites  
191 were placed in a 1-inch round container and filled with impregnation resin. The resulting cylindrical samples were polished  
192 on the top side containing the iberulites and examined by electron microscopy. A BSE image of the polished section of an  
193 iberulite was also segmented using Avizo software (Thermo Fisher), enabling the counting of individual particles and the  
194 determination of their equivalent spherical diameter  $d_{ve}$ , defined as the diameter of a sphere with the same volume as the  
195 particle.

$$196 d_{ve} = \frac{1}{\rho^2} \sqrt{64\pi B^3} \quad (2)$$

197 with B representing the area covered by the particle on the sample substrate, and P the perimeter of the particle. Due to the  
198 resolution of the segmentation process, only particles larger than  $0.05 \mu\text{m}$  can be recognized and counted. To compare the  
199 SMPS with the SEM-derived PSDs, the mobility diameter  $d_m$  obtained by SMPS must first be converted to the volume  
200 equivalent diameter  $d_{ve}$  (Decarlo et al., 2004):

$$201 d_{ve} = \frac{C_c(d_{ve})}{C_c(d_m)\chi} d_m = CF d_m \quad (3)$$

202 with  $C_c(d_m)/C_c(d_{ve})$ , the Cunningham slip correction factor ratio between the mobility and volume equivalent  
203 diameters, CF the conversion factor, and the dynamic shape factor  $\chi$ :

$$204 \chi = \frac{F_P}{F_{ve}} \quad (4)$$

205 which is defined as the ratio of the drag force on the nonspherical particle  $F_P$  to the drag force on its volume equivalent sphere  $F_{ve}$  when both are  
( $\chi = 1$ ) with the same velocity as the measured particle:

$$206 v_e = \frac{neC_c(d_m)}{3\pi\eta d_m} = \frac{neC_c(d_{ve})}{3\pi\eta\chi d_{ve}} \quad (5)$$

207 From equation (5), the conversion equation (3) follows.  $C_c(d_{ve})$  is unknown. The ratio  $C_c(d_m)/C_c(d_{ve})$  has, to our  
208 knowledge, been measured only for salt particles smaller than 600 nm. The latter (extrapolated for particles > 600 nm)  
209 was used to convert the volume-equivalent diameter into the mobility diameter. It is always less than one, increases with  
210 size, and decreases with aspect ratio. The axis ratios  $b/a$  (AR, the ratio of the longest dimension  $b$  to the orthogonal  
211 width  $a$ ) and shape factors appear to depend on size, flow regime (Alexander et al., 2016), and orientation (Cheng et al.,  
212 1988), ranging from near unity for smaller particles to a value of 3 for the largest particles. The average inside the  
213 iberulites is 1.46, close to 1.4 reported for dust particles in the 2 to 10  $\mu\text{m}$  range. Overall, CF is mostly smaller than 1.0.

214 The converted volume-equivalent diameters are smaller than the mobility diameters.

Deleted: The measurement voltage (12 kV)

Deleted: particle size distribution of the total dust, iberulites,

Deleted: with a FEI Sirion FEG microscope (20 kV) equipped detector with an 80 mm<sup>2</sup> window, a high-efficiency four-quadrant AZtecFeature software (Oxford Instruments) the same EDS system mentioned earlier.

Deleted: .

Deleted: .

Commented [JR3]: Are you sure this number is correct? 50 nm? Just to be sure

Deleted: (Decarlo

Deleted:

Deleted: et al., 2004):

Deleted: .

Deleted: □

Deleted:  $F_{ve}$ , when

Deleted:  $C_c$

Deleted:  $C_c$

Deleted: , and overall, CF is mostly smaller than the correspond

Deleted: <#> is the lowest possible to excite characteristic X-rays in the sample. Several blank analyses of empty



## 215 2.4 X-ray diffraction

216 A loose single dust particle sample, containing no iberulites but collected during the same period when the iberulites fell in  
217 Fribourg, was analyzed with a Rigaku Ultima IV diffractometer equipped with a Position Sensitive Detector (PSD).  
218 Diffractograms were recorded from 5° to 70° 2θ in step-scan mode (0.02°/step and 1 min/°). The copper X-ray tube was  
219 operated at 40 kV and 40 mA. The CuKα-radiation was filtered with a nickel foil. Quantitative phase analysis by Rietveld  
220 refinement (Bish and Post, 1993) was performed on the recorded patterns using the PDXL2 software package (Rigaku). The  
221 refined instrumental parameters are the zero shift, the sample displacement, and the peak shape, modelled using a Pseudo-  
222 Voigt profile. The structure parameters for the phases present in the sample were taken from the International Centre for  
223 Diffraction Data database, but only the scale factor, the unit-cell parameters, the isotropic overall temperature factor, and, in  
224 some cases, the preferred-orientation parameter (phyllosilicates, calcite) were refined using the March-Dollase (Dollase,  
225 1986) formalism. The fractions of the phases present were determined through the scale factors. The atomic positions and site  
226 occupancies were held fixed during refinement. Iterations were performed until the refinement converged.

## 227 3 Results

### 228 3.1 Dust source and trajectory

229 For air masses arriving at 2000, 2500, and 3000 m ASL over Fribourg in the early afternoon of February 6th, HYSPLIT  
230 back-trajectory calculations were performed for hourly arrival times from 9:00 to 15:00 h.

Deleted: <#>-boron substrates have shown that under the applic  
substrate surface contains only the element boron  
and that in an area of ca. 1 mm<sup>2</sup>, a maximum of five particles v  
substrates. These particles are organic  
in nature and most likely follicles. Images obtained with both  
SEM were used to characterize  
the size distribution of the iberulites and their microstructure u  
Fisher).  
The picked iberulites were placed in a round 1-inch container  
resin. The resulting cylindrical  
samples were polished on the top side containing the iberulites  
FEG microscope (20 kV)  
equipped with the same EDS system as the Zeiss microscope a  
polished section was also segmented  
using Avizo software (Thermo Fisher), allowing the counting  
determination of their equivalent  
spherical diameter, as well as the corresponding size distributi  
segmentation process, only  
particles larger than 0.05 μm are possible to be recognized and

Deleted: ¶

Deleted: .

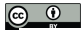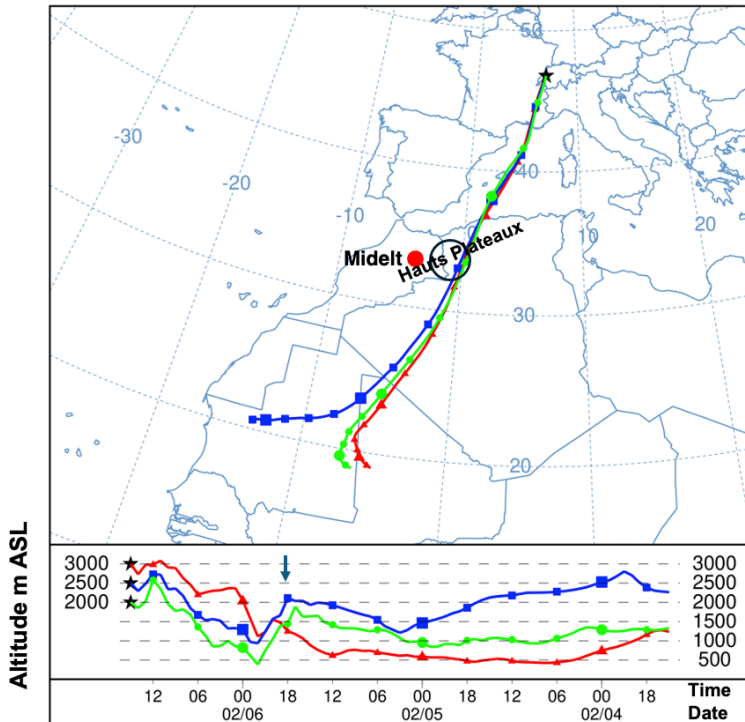

231  
 232 **Figure 2:** Back trajectories for air masses arriving over Payerne at 15:00 UTC, February 6<sup>th</sup>. The black circle shows the location  
 233 of the first appearance of the dust plume entrained across the Mediterranean Sea towards central Europe. The black arrow  
 234 points to the location markers inside the black circle.  
 235  
 236 The dust originated in northwest Africa (Fig. 2), between the southern Moroccan border and northwestern Algeria. Satellite  
 237 images showed a dust plume forming in a region called "Hauts Plateaux" (also known as "Hautes Plaines") between the Pre-  
 238 Sahara and the Tell Atlas (Fig.3). The air masses arriving over the Hauts Plateaux during the early afternoon  
 239 of February 5<sup>th</sup> were at altitudes ranging between 1500 m to 3500 m AGL, which is within the  
 240 Planetary Boundary Layer (PBL; calculated with the READY software (Rolph et al., 2017)), spanning from 2600 to 4500  
 17 m.

- Deleted: Fig. 2.
- Deleted: (see supplement 1)
- Deleted: <#>The HYSPLIT backtrajectory calculations for air masses arriving over Payerne at 15:00 UTC on February 6<sup>th</sup> originated in NW Africa
- Deleted: (Fig. 1) between the southern Moroccan border and northwestern Algeria. Satellite images showed the appearance of a dust plume (Fig. 2)
- Deleted: and evening
- Deleted: over the Haut Plateau a
- Deleted: 1000 m and 2000 m
- Deleted: i.e., well
- Deleted: (Fig. 4).
- Deleted: (PBL, Fig. 3).
- Deleted: On February 5<sup>th</sup>, the upper limit of the PBL in the H

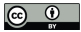

241 Surface wind velocity (10 m above ground) increased from 40 km/h to about 70 km/h.

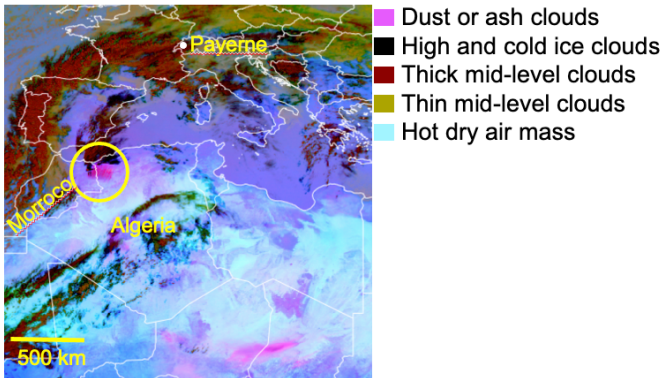

Figure 3: Satellite RGB image (5.2.2021, 22:00 UTC) from the SEVIRI dust product. The dust plume transported to Central Europe is seen east of the Moroccan – Algerian border.

242 Weather stations in the Atlas Mountains recorded hurricane-force gusts (e.g., 117 km/h on 05.02.21 in Midelt, Morocco  
243 (Hoshiyaripour, 2021). This is clearly above the threshold wind speed for dust emissions given for western Algeria  
244 (Marticorena et al., 1997). The dust plume was transported northeastward toward the Mediterranean Sea, where a low-  
245 pressure system formed. The associated warm conveyor belt lifted the dust to higher altitudes and transported it with the  
246 polar jet across the Mediterranean toward the Alps, a process known as an "atmospheric river" (Francis et al.,  
247 2022; Rautela et al., 2024). Source sensitivities (the probability that an air mass originates from a given source  
248 along a certain path) for Saharan dust (fine mode) arriving at JFJ were calculated using FLEXPART to generate  
249 backward trajectories and assess the general surface contact of air masses over the Sahara Desert (Collaud  
250 Coen et al., 2025). The sensitivities indicate that the most common pathway is from the Sahara, over the  
251 Mediterranean, directly to the Alps.

### 253 3.2 Local meteorology

254 Ground temperature measurements and the T/RH profiles from the radio sonde released at 11:00 UTC in Payerne, revealed  
255 relatively high temperatures for February 6th in Western Switzerland (4°C at the ground and a 0°C level at  
256 2500 m ASL) and along with a typical inversion situation (Fig. 4). Compared to conditions during previous IFs over the  
257 Iberian Peninsula (Diaz-Hernandez and Sanchez-Navas, 2016) the temperature was much lower. The vertical profile of

Deleted: 3500 m AGL, and the velocity in the surface air layer

Deleted: ¶

Deleted: ¶

Deleted: ¶

152

<object>Figure 1: Back trajectories for air masses arriving over 2000m AGL during February 6th between 12:00 and 18:00 UT. The location of the first appearance of the dust plume entrained across the Mediterranean towards central Europe.

Section Break (Next Page)...

152

<object>Figure 1: Back trajectories for air masses arriving over 2000m AGL during February 6th between 12:00 and 18:00 UT. The location of the first appearance of the dust plume entrained across the Mediterranean towards central Europe.

Section Break (Next Page)...

<object>Figure 1: Back trajectories for air masses arriving over 2000m AGL during February 6th between 12:00 and 18:00 UT. The location of the first appearance of the dust plume entrained across the Mediterranean towards central Europe.

Section Break (Next Page)...

¶

<object>Figure 2: Satellite RGB image (5.2.2021, 22:00 UTC) from the SEVIRI dust product, showing the presence of dust by pink color. The dust plume transported to Central Europe is seen east of the Moroccan – Algerian border.

¶

¶

¶

¶

¶

¶

¶

¶

¶

¶

¶

¶

¶

¶

¶

¶

Deleted: entrained in a NE direction

Deleted: ¶

Deleted: ¶

Sea toward the Alps, a process referred to as an "atmospheric river" (Francis et al., 2022; Rautela et al., 2024). Source sensitivities were calculated for Saharan dust (fine mode) arriving at JFJ to obtain the backward trajectories.

Deleted: ¶

Deleted: ¶

Deleted: ¶



258 relative humidity (RH) was complex. RH decreased from 97% at the ground level to a very low 48% at 1000 m,  
259 then increased to 61% at 3500 m ASL (Fig. 4). RH remained between 48 and 55% up to an altitude of 4300 m ASL,  
260 where it began to increase to 97% resulting in a 100 m thick layer between 5000 and 5100 m ASL with  
261 temperatures below the frost point.

Deleted:  
Deleted: ¶  
Deleted:

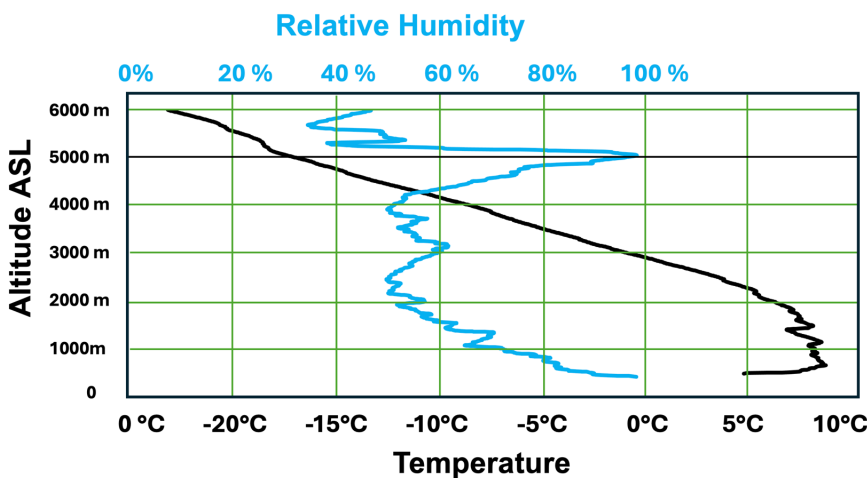

262  
263 Figure 4: Temperature (black line) and relative humidity (blue line) as a function of altitude from the radio sounding. The balloon  
264 was released in Payerne at 11:00 h UTC. The balloon flew 30 km to the NW during the above recording (MeteoSwiss).  
265

Deleted: Fig. 3. T  
Deleted: The balloon

266 The Payerne ceilometer time profile (Fig. 5) shows a cloud base at 5000 m ASL at midnight, with reflections that  
267 may be due to aerosol (SDE) or ice particles, extending from the cloud base down to 3500 m. Early in the morning, the cloud  
268 base lowered to 4000 m, and the reflections extended down to 2500 m. The below-cloud reflections have a streaky  
269 appearance in the ceilogram. After a large gap in ceilometer recordings between 9:00 and 11:00 h UTC, a reflection wall  
270 extending from 3500m to the ground appeared. These strong reflections from dust particles persisted throughout the day.  
271 The cloud base lowered from 4000 m to 2000 m during the evening. At around 22:30 h, three short periods with very strong  
272 reflections were observed; during those times, precipitation was recorded on the ground. After 23:00 h, the reflections  
273 became less intense.

Deleted:  
Deleted:  
Deleted:  
Deleted:  
Deleted:  
Deleted:  
Deleted: ¶

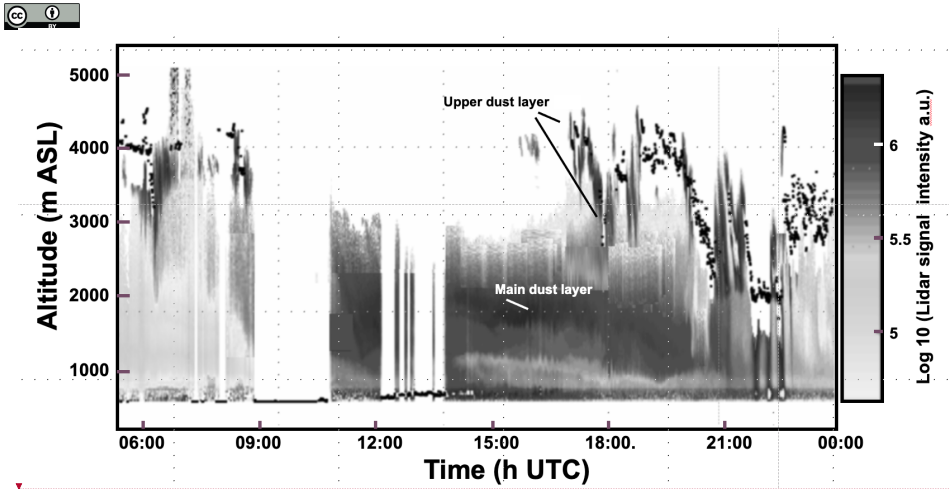

274  
275 **Figure 5:** Ceilogram Ceilometer profile for February 6<sup>th</sup> (MeteoSwiss). The little black dots on top of the reflections  
276 show the meteorological clouds' bottom. The white stripes are gaps due to ground fog  
277 Lidar measurements were taken between 15:00 and 17:00, during the signal's peak values and the average was used to  
278 derive a mass-concentration profile (Fig. 6) across the dust cloud. The altitude range of 4000-5000 meters served as the "no  
279 aerosol" reference. The profile was derived using a lidar ratio of  $0.57 \text{ m}^2/\text{sr} \pm$   
280  $\text{sr}$  at 532 nm (Haarig et al., 2022), an Ångström coefficient of 0.5 for long-range transported dust in northern European regions,  
281 (Ansmann et al., 2001), and a mass extinction ratio at 532 nm of  $0.47 \pm 0.04 \text{ m}^2 \text{ g}^{-1}$  (Nemuc et al., 2013). The profile shows  
282 three peaks. The maximum concentration of  $81 \mu\text{g m}^{-3}$  was observed at an altitude of 1675 m. The second-largest  
283 concentration was recorded just above the ground, and a third small peak was located just above the cloud base at  
284 approximately 3500m.

Deleted: <#> [4]

- Deleted: 181
- Deleted: 5g. 4
- Deleted: .
- Deleted: e
- Deleted: show themeteorological
- Deleted: 182
- Deleted: ¶
- Deleted: <#>¶
- Deleted: 9¶
- Deleted: ¶

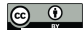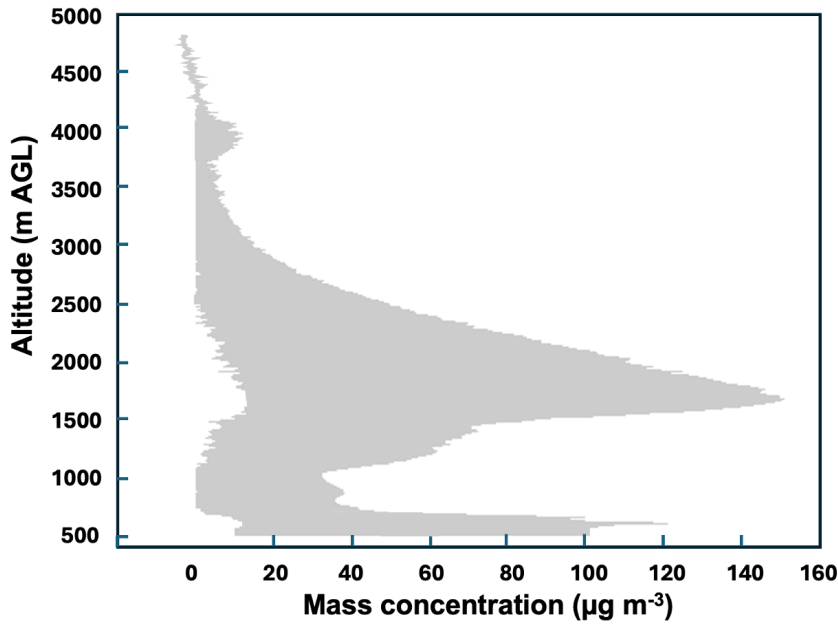

285  
286 **Figure 6:** Aerosol mass concentration profile across the dust cloud calculated from the average of Lidar measurements taken  
287 between 15:00 and 16:59 h (MeteoSwiss).

### 288 3.3 Morphology and microstructure of iberulites

289 Giant particles were previously observed following long-range transport of Saharan dust (Van Der Does et al., 2018).  
290 Rapid transport, high turbulence, and electrical forces are thought to counteract for the particles' weight. In our case, the  
291 large "particles" were not single particles but multiminerall particle aggregates with spherical to slightly ellipsoidal shapes,  
292 known as iberulites after their first recording on the Iberian Peninsula (Fig. 7) (Díaz-Hernández and Párraga, 2008). The cores  
293 of the iberulites are composed mainly of coarser mineral grains (Fig. 8 e,f, and Fig. 9) that have accreted without a visible  
294 cement matrix. Except for a thin, dense surface layer, the iberulite cores show no internal structure, such as layering or  
295 preferential grain orientation. The iberulites collected in St L egier (n = 425) are larger than the Iberian specimens, with a  
296 mean diameter of 113 µm (range: 43 – 365 µm).

Deleted: Aerosol mass concentration profile across the dust

Deleted: <#>3.3 Iberulites collected in Fribourg and St. L egier  
In Fribourg, very large particles with diameters exceeding 30 µm

Deleted: <#>single

Deleted: <#>have been

Deleted: <#>¶

Deleted: <#>previously

Deleted: gh¶

Deleted: compensate

Deleted: ¶

Deleted: ¶

Deleted: ¶

Deleted: ¶

Deleted: ¶

Deleted: ¶

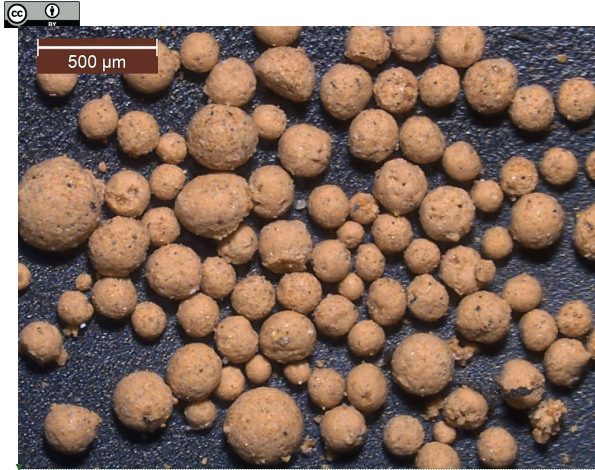

297

298 **Figure 7:** Light microscopy image of iberulites collected in St L gier.

299 Most iberulites have smooth surfaces with few large surface pores (Fig. 8 a-d), most likely due to particles ejected from the

300 aggregates. Spherical surface depressions, e.g., vortices formed by airflow around aggregates, as observed on Iberian iberulites (Diaz Herm ndez et al., 2015).

Moved (insertion) [4]

Deleted: .6

Deleted: .

Deleted: 7

Deleted: ejected from

Moved (insertion) [5]

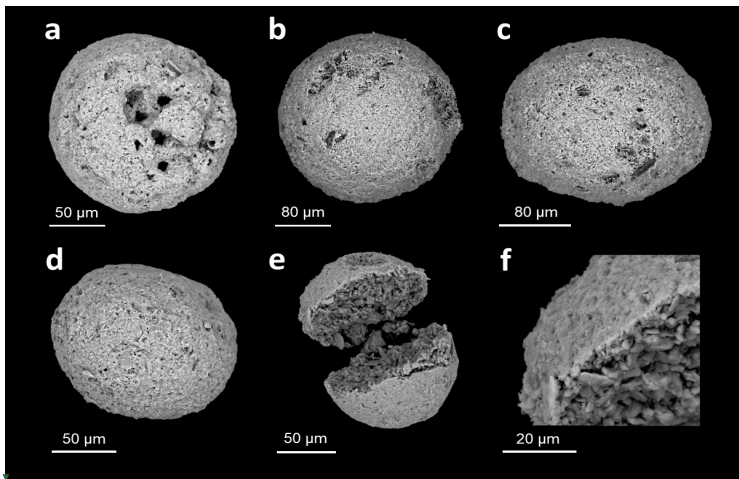

301

302 **Figure 8:** SEM images of some iberulites collected in St L gier on February 6th, 2021. Figure 8 f shows the fine-  
303 grained rim and the coarse-grained of an iberulite.

Deleted: ¶

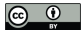

304

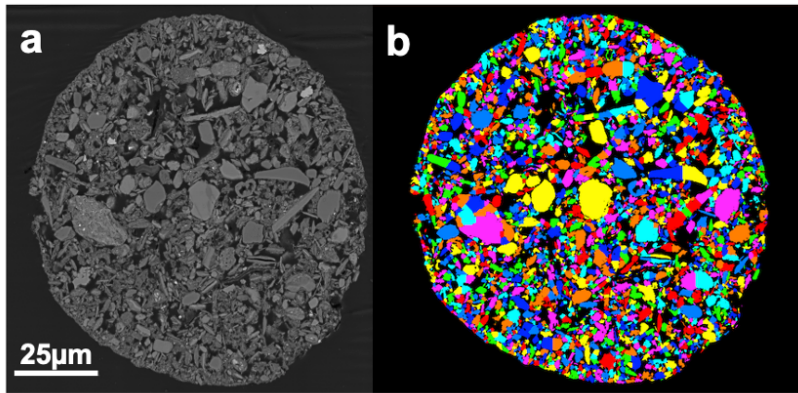

305

306

307

308

309

310

311

312

313

314

315

316

317

318

319

320

321

322

323

324

325

Figure 9: (a) BSE image of a polished section through an iberulite, and (b) the corresponding segmentation obtained from AVIZO. The different colors are used to better distinguish individual particles but do not represent any specific elemental composition.

Most iberulites have smooth surfaces with few large surface pores (Fig. 8), most likely due to particles that have been ejected from the aggregates. Spherical surface depressions, e.g., vortices formed by the flow of air around the aggregates, as observed on Iberian iberulites (Díaz-Hernández and Párraga, 2008), are very rare among the sampled iberulites.

### 3.4 PSDs at JFJ and inside the iberulites.

During periods when JFJ is cloud-free, above the PBL, and free of Saharan dust, the PSD has two modes: a stronger one near  $0.05 \mu\text{m}$  and a weaker one between  $0.15$  and  $0.4 \mu\text{m}$  (Nessler et al., 2003; Bukowiecki et al., 2016; Cozic et al., 2008 (Fig. 10, green bars)). The PSD measured at 11:00 UTC on February 6th during the SDE is monomodal, with maximum near  $0.150 \mu\text{m}$  (see Fig. 10, yellow bars), and shows much higher concentrations than measurements without SDEs, similar to PSDs observed in previous Saharan dust episodes at JFJ (Chou et al., 2011). Coarse-mode particles arriving at JFJ were well documented in previous particle volume distributions, with a mode at  $1.4 \mu\text{m}$  (Schwikowski et al., 1995). Saharan dust clouds transported over long distances, such as to Barbados during the SALTRACE campaign (Weinzierl et al., 2017), to Aeronet sites in the eastern Caribbean (Velasco-Merino et al., 2018), over the Mediterranean Sea during the ChArMEx/ADRI-MED campaign (Denjean et al., 2016), and over Cape Verde during the SAMUN2 campaign (Weinzierl et al., 2011) have similar PSDs. The largest particles observed at the Caribbean sites well above the maximum diameter expected for settling due to Stokes' law during transport. The modes observed at JFJ and in the campaigns cited above are similar to the PSDs observed in the source regions (Panta et al., 2023; Bencherif et

Deleted: <#>Figure 8: SEM images of some iberulites collected on February 6th, 2021. Figure 8 f shows the fine-grained rim of an iberulite.

Deleted: ¶

Deleted: v¶

Deleted: The long-term PSD measured with SMPS and CPC at JFJ, which was taken as representative of the PSD in the main dust layer. During times when JFJ is free of Saharan dust present the

Deleted: PSD in the main dust layer. During times when JFJ is free of Saharan dust present the

Deleted: s¶

Deleted: Herrmann et al., 2015;

Deleted: )

Deleted: (

Deleted: (Cozic et al., 2008)

Deleted: .

Deleted: a¶

Deleted: ¶

Deleted: ¶

Deleted: ¶

Deleted: ¶

Deleted: ¶

Deleted: et¶

Deleted: ¶



326 al., 2022; Dubovik et al., 2006), but are lower in concentration and lack particles > 30 μm.

327

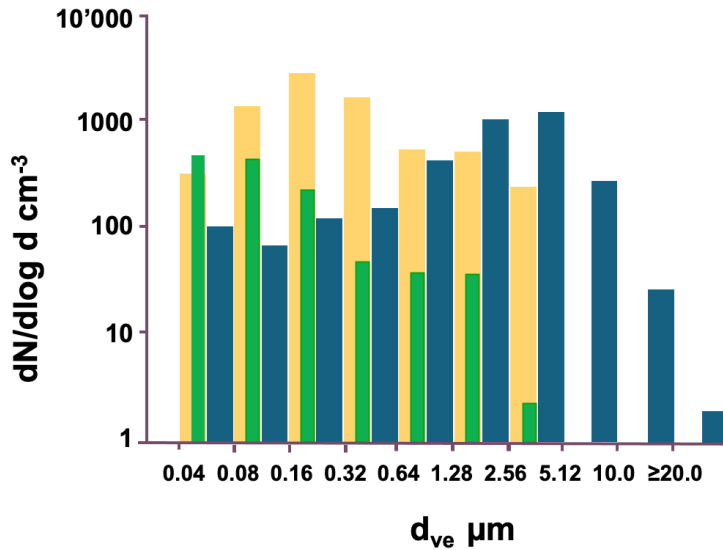

328

329

330 Figure 10: Jungfraujoch PSD measured in April 2004 during a period when JFJ was above the PBL, cloudfree and no SDE  
331 (green bars), during the SDE of February 6th at 12:00 (yellow bars, shifted 1 bin to the left relative to the original data, s. text),  
332 and for an iberulite sample collected in St. Léger (blue bars).

### 333 3.5 XRD -results (Rietveld analysis) and and EDS - analyses

334 X-ray diffraction showed that the dust contained phyllosilicates (illite, muscovite, and kaolinite, totaling 34.1 wt%),  
335 followed by carbonates (27.0 wt% calcite, 4.0 wt% dolomite) and quartz (23.3 wt%). The concentrations of gypsum and halite  
336 were below the detection limit. Analysis of individual particles within an iberulite confirms the XRD results. EDS analyses  
337 on the polished iberulite section have a resolution of 1–2 μm, depending on section thickness and local composition.

338 Compositions of particles <1 μm should therefore be interpreted with caution. Trends from the ideal muscovite  
339 composition toward the calcite composition, as well as toward the quartz compositions, in the (Mg+Fe+Si+K–Al–Ca) ternary  
340 diagram indicate that the particles are mixtures of the three phases (Fig. 11 a). The ternary diagram (Mg+Fe+Si+K–S–Ca), with  
341 Mg+Fe+Si+K as the "silicate" corner and Ca as the "calcite" corner (Fig. 11 b), shows measurements mainly along the joint

17

Deleted: ¶

Deleted: n.



342 between the silicate and calcite corners, indicating mixed particles between these minerals, with some measurements  
343 scattered in the triangle silicates-calcite-gypsum, indicating mixed particles among these phases or the presence of sulfur on  
344 other particle surfaces.

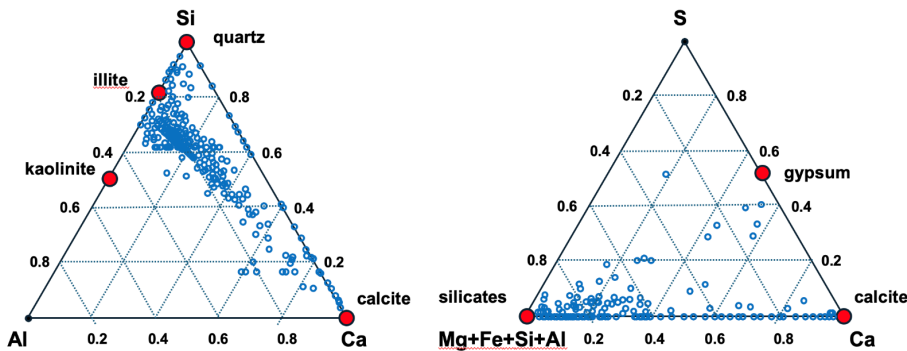

345  
346 Figure 1: Ternary diagrams : (a) (Mg+Fe+Si+K–Al–Ca), (b) (Mg+Fe+Si+K–S–Ca).

## 347 4. Discussion

### 348 4.1 Dust composition

349 Dust from potential source areas (PSA) has been characterized by bulk chemistry (Kandler et al., 2007) and mineralogy  
350 (Scheuvs et al., 2013). Mineralogical fingerprints include phyllosilicates, such as the ratio of illite to kaolinite concentrations  
351 (I/K) (Caquineau et al., 1998; Chester and Johnson, 1971; Scheuvs et al., 2013). In Northern Africa, the general trends are  
352 increases in I/K from S to N and from E to W. The value for the present samples is approximately 2.9, consistent with  
353 values reported from the Western Sahara, e.g., >2 in NW Algeria and Morocco. High carbonate contents (>10 wt%,  
354 calcite > dolomite) are also a fingerprint of dust from the northwestern part of Africa (Avila et al., 1997). Similar to  
355 illite, carbonate content decreases continuously toward the south (Paquet, 1984). The high carbonate content of dust  
356 emitted from the northern regions within and adjacent to the Atlas Mountains reflects the geology of those regions (Grousset  
357 et al., 1992).

### 358 4.2 Iberulite formation and insights from internal structure

359 The layer at 5000 m altitude with supersaturated atmospheric conditions is most likely the source of the ice/snowflake

Deleted: 12  
Moved (insertion) [9]  
Deleted: n  
Deleted: <#>  
Deleted: T  
Deleted: T  
Deleted: T  
Deleted: T  
Deleted: n  
Moved up [3]: The Payerne ceilometer time profile (Fig. 5) ASL at midnight, with reflections that may be due  
Moved (insertion) [8]  
Deleted: 300  
X-ray diffraction (Fig. 11) showed that iberulites contain and kaolinite, totaling 34.1 wt%, followed by carbonates (27.0 wt% calcite, 4.0 wt% dolomite) concentrations of gypsum and halite were below the detection limit.  
274  
(MeteoSwiss) three peaks. The maximum concentration of altitude of 1675 m. The second-largest concentration was recorded just above the ground, and a third small peak cloud base at approximately 3500 m.  
typical inversion situation (Fig. 4a). In contrast to conditions in the Iberian Peninsula (Diaz-Hernandez and Sanchez-Navas, 2016) the temperature was much lower and relative humidity (RH) was complex. RH decreased from 100 % at the ground level to a value increased to 85 % at 3500 m ASL (Fig. 4b).  
The Payerne ceilometer time profile (Fig. 5) shows a cloud at midnight, with reflections that may be due to  
169  
Figure 4: Temperature (a) and relative humidity (b) as a function of altitude during a radio sounding. The sounding balloon was released at 15:00 UTC on 15 February 2026.  
Deleted: T



360 precipitation that led to the formation of iberulites. The temperature at the upper boundary of the dust layer was below  
361 0° C and turned positive around 2500 m. However, melting of the frozen hydrometeors most likely began at a much  
362 lower level due to the low relative humidity, in which the water vapor density of the surrounding air is lower than the  
363 equilibrium water vapor density of frozen hydrometeors at the freezing point; therefore, sublimation of water vapor occurs  
364 from the surface of the latter. Because of this sublimation process, latent cooling can push the surface temperature of the  
365 hydrometeor below 0 °C (Matsuo and Sasyo, 1981; Heymsfield et al., 2015). The width of the non-melting layer in the  
366 atmosphere increases nearly linearly with decreasing relative humidity, from 120 m at 90% to 700 m at 50%. The relative  
367 humidity at the top level of the main Sahara dust layer is around 70% and decreases with decreasing altitude. It is therefore  
368 probable that the melting level is displaced far into the massive Saharan dust layer. The layer at 5000 m altitude with  
369 supersaturated atmospheric conditions is most likely the source of the ice/snowflake precipitation that led to the formation  
370 of iberulites. Although difficult to distinguish from aerosol particles, the reflections just below the cloud base may  
371 originate from frozen hydrometeors. Both solid ice crystals and liquid drops can capture particles.

372  
373 Several studies on BSC (Feng, 2009; Kyrö et al., 2009; Paramonov et al., 2011) indicate that frozen hydrometeors are more  
374 effective scavengers of aerosol particles than rain on an equivalent water-content basis. The fluttering, zigzagging fall style of  
375 frozen hydrometeors (Hashino et al., 2016; Kajikawa, 1992; Tagliavini et al., 2021; Mccorquodale and Westbrook, 2021;  
376 Stringham et al., 1969), prolongs their trajectories, thereby increasing the probability of collisions with aerosol particles  
377 and, consequently, CE. CE also increases with temperature and relative humidity, although there is a discrepancy between  
378 experimental/natural data and theory (Santachiara et al., 2023). The highest CE has been recorded for mixed precipitation  
379 types and frozen hydrometeors at temperatures slightly above 0 °C. At these temperatures, frozen hydrometeors develop a  
380 stickier liquid layer at the surface. The increase in CE at higher RH is attributable to increased collector capacitance.  
381 (Paramonov et al., 2011). (Miller and Wang, 1989). The temperatures between the likely origin of the frozen hydrometeors  
382 and 2000 m ASL are in this range. The Greenfield gap for frozen hydrometeors fall situations was smaller, spanning 0.09–  
383 0.3 µm, compared to the gap observed for rain. This range is also observed for the iberulites collected in the present  
384 fieldwork, supporting frozen hydrometeors as dust scavengers. The increased CE of frozen hydrometeors is probably also the  
385 reason for the larger diameters observed in Swiss iberulites compared to Iberian iberulites. All frozen hydrometeors  
386 form thin liquid films on the surface and become stickier (Fujiyoshi, 1986; Knight, 1979; Leinonen and Lerber, 2018;  
387 Oraltay and Hallett, 2005). Large frozen hydrometeors increase in size through coalescence in the melting layer (McFarquhar  
388 et al., 2007). The behavior of scavenged aerosol particles within melting hydrometeors has not been analyzed to date.  
389 Most likely, they are incorporated into the newly formed raindrops. Within and below the melting layer, due to the very  
390 low relative humidity (45% at 1000 m, at the bottom of the massive dust layer), raindrops will dry very rapidly. A  
391 technological analog of this process is the (spray) drying of a powder suspension, which is used, e.g., in the ceramic, food, or  
392 pharmaceutical industry (Santos et al., 2018). The difference between the drying of a droplet in a spray drier and that of a  
393 rain droplet falling out of a cloud is the temperature difference between the droplet and the drying air stream, which is  
394 around 200°C in a spray drier. Droplets in a spray dryer relax into spherical shapes and are analogous to raindrops. The latent  
395 heat of water evaporation induces a strong heat flux from the droplet surface into the gas stream. This, in turn, drives  
396 thermophoretic particle displacement toward the droplet surface and a specific microcirculation in a layer near the surface,  
397 driven by the surface-tension gradient (Iskandar et al., 2003). This microcirculation entrains particles toward the droplet  
398 surface, leading to size- and density-based segregation. Smaller and/or less dense particles move faster toward the droplet  
399 surface, forming a surface layer. Coarser particles are concentrated in the core. Such a shell-core structure was observed in  
400 the present iberulite and has also been reported in the Iberian examples (Díaz-Hernández and Párraga, 2008; Párraga et al.,  
401 2021), with fine-grained phyllosilicates concentrated in the shell and coarse-grained quartz grains in the core. 5. Conclusion.

## 402 5. Conclusions

403 To our knowledge, this analysis represents the first detailed study of iberulite fall in Switzerland. In contrast to the Iberian  
404 cases, the IF fall occurred under much colder conditions, e.g., temperatures around 0° and decreasing relative humidity along

**Deleted:** The IF on February 6th in Fribourg was observed in conditions during the fall are therefore well known. Two mechanisms have been proposed for aggregating within a drop (Díaz-Hernández and Sánchez-Navas, 2016; Párraga et al., 2021): 1. The coalescence increases the number of condensation nuclei within a single growing drop, i.e., in-cloud denoted as 'nucleation scavenging', or 2. the concentration increases through collisions between the cloud along its trajectory to the ground. This mechanism is called below-cloud scavenging (BSC) (Pruppacher and Klett, 2010). The BCS rate strongly depends on rainfall intensity and the drop's ability to collect particles, called the collection efficiency (CE) (Volken and S. Laakso et al., 2003). CE is the number (or mass) of particles captured by a drop of particle number in the cylindrical volume swept by the drop per unit trajectory length. If CE were of the drop, the particle, environmental parameters, and the capture processes, the gra would reflect the size distribution of the dust in the volume traversed by the drop. Fig. 10). The mechanisms

... [6]

**Deleted:**

**Moved up [10]:** Within and below the melting layer, due to the (45% at 1000 m, at the bottom of the massive dust

**Moved (insertion) [10]**

**Deleted:**

... [8]

**Deleted:**



405 the fall trajectory. Iberulites form through the accumulation of particles inside raindrops. A comparison of the PSD inside the  
406 iberulites with the PSD measured in the dust cloud at the Jungfraujoch, which encountered the same cloud, revealed a  
407 Greenfield gap in the iberulite PSD, i.e., a lack of particles in the range between 0.1 and 0.3  $\mu\text{m}$ . The presence of a  
408 Greenfield gap within the iberulites supports below-cloud scavenging, i.e., particle capture through collisions of particles  
409 with droplets below a cloud, as the mechanism for particle accumulation. The gap arises from particle trajectories in the  
410 flow around the falling droplet, which depend on particle size. The freezing temperature, low relative humidity, and  
411 ceilogram signals suggest that particle collisions occurred not with raindrops but with snowflakes or ice crystals. The  
412 latter are known to be better scavengers than raindrops. Since 2021, more iberulites have been found in filter samples  
413 collected during SDEs in Switzerland. They will be analysed to confirm the findings and to gain a better understanding of  
414 the relationship between iberulite formation and meteorological conditions.  
415

#### Author contributions

BG designed the study. CN, BG, and JR performed the measurements. BG analyzed the data. MS provided data from Jungfraujoch. BG, JR

#### Competing interests

The authors declare that they have no conflict of interest.

#### Acknowledgements

The authors acknowledge Maxime Hervo from Meteoswiss for the supply of meteorological and lidar data. We thank also Mario Wannier for support from JFJ.

#### Financial support

This research received no external funding.

416

Deleted: ¶  
Deleted: ¶

#### Deleted: References ¶

Alexander, J. M., Bell, D. M., Imre, D., Kleiber, P. D., Grass, J. M., and S. M.: Measurement of size-dependent dynamic shape factors of quartz particles. *Aerosol Science and Technology*, 50, 870–879, 10.1080/02717085.2017.1358881, 2017.  
Ansmann, A., Bösenberg, J., Chaikovskiy, A., Comerón, A., Freudenthaler, V., Ginoux, P., Komguem, L., Linné, H., Linn, Matthias, V., Mattis, I., Mitev, V., Müller, D., Music, S., Nic Soblewsky, P., Srivastava, M. K., Stohl, A., Torres, O., Vau Wiegner, M.: Long range transport of Saharan dust to northern Europe observed with EARLINET. *Journal of Geophysical Research*, 108, 4783, 10.1029/2003JD003757, 2001.  
Ashpole, I. and Washington, R.: A new high-resolution central summertime dust source map from automated satellite dust products. *Geophysical Research Atmospheres*, 118, 6981–6995, 10.1029/2015JD023001, 2015.  
Avila, A., Queralt-Mitjans, I., and Alarcón, M.: Mineralogical composition of dust particles delivered by red rains over northeastern Spain. *Journal of Geophysical Research*, 102, 21977–21996, 10.1029/97jd00485, 1997.  
Barthazy, E., Henrich, W., and Waldvogel, A.: Size distribution of dust particles in the melting layer. *Atmospheric Research*, 47–48, 193–208, 10.1016/0167-6369(98)00017-9, 1998.  
Bencherif, H., Bounhir, A., Bègue, N., Millet, T., Benkhaldo, and Gadouali, F.: Aerosol distributions and Sahara dust transport over the Mediterranean region. *Remote Sensing*, 14, 1–14, 2022.  
Bish, D. L. and Post, J. E.: Quantitative mineralogical analysis of dust particles. *American Mineralogist*, 78, 10.2138/am-1993-0307, 1993.  
Bukowiecki, N., Weingartner, E., Gysel, M., Coen, M. C., Zieger, M., Steinbacher, M., Gäggeler, H. W., and Baltensperger, U.: A new dust emission model for the high altitude research station Jungfraujoch. *Aerosol and Air Quality Research*, 16, 764–788, 10.4209/aaqr.2016.16.4.764-788, 2016.  
Buseck, P. R. and Pósfai, M.: Airborne minerals and related compounds. *Proceedings of the National Academy of Sciences of America*, 96, 10.1073/pnas.96.7.3372, 1999.  
Caquineau, S., Gaudichet, A., Gomes, L., Magonthier, M. C., and L. J.: Clay ratio as a relevant tracer to assess the origin of soil-derived dust. *Research Letters*, 25, 983–986, 10.1029/98GL00569, 1998.  
Allen, M. D.: Dynamic Shape Factor of a Plate-Like Particle. *Aerosol Science and Technology*, 8, 109–123, 10.1080/02786828808959176, 1988.  
Chester, R. and Johnson, L. R.: Atmospheric dusts collected in the Sahara Desert, Africa and the Iberian Peninsula. *Marine Geology*, 11, 251–268, 10.1016/0027-3227(71)90027-2, 1971. [... [9]

Deleted: 604 ¶  
605 ¶  
606 ¶  
607 ¶ [... [10]

1 **References**

2 Alexander, J. M., Bell, D. M., Imre, D., Kleiber, P. D., Grassian, V. H., and Zelenyuk, A.: Measurement of size-dependent  
3 dynamic shape factors of quartz particles in two flow regimes, *Aerosol Science and Technology*, 50, 870–879,  
4 10.1080/02786826.2016.1200006, 2016.

5 Ansmann, A., Bösenberg, J., Chaikovsky, A., Comerón, A., Eckhardt, S., Eixmann, R., Freudenthaler, V., Ginoux, P.,  
6 Komguem, L., Linné, H., Linné, H., Márquez, M. A. N. L., Matthias, V., Mattis, I., Mitev, V., Müller, D., Music, S., Nickovic,  
7 S., Pelon, J., Sauvage, L., Sobolewsky, P., Srivastava, M. K., Stohl, A., Torres, O., Vaughan, G., Wandinger, U., and Wiegner,  
8 M.: Long range transport of Saharan dust to northern Europe: The 11th October 2001 outbreak observed with EARLINET,  
9 *Journal of Geophysical Research: Atmospheres*, 108, 4783, 10.1029/2003JD003757i, 2001.

10 Avila, A., Queralt-Mitjans, I., and Alarcón, M.: Mineralogical composition of African dust delivered by red rains over  
11 northeastern Spain, *Journal of Geophysical Research Atmospheres*, 102, 21977–21996, 10.1029/97jd00485, 1997.

12 Bencherif, H., Bounhir, A., Bègue, N., Millet, T., Benkhaldoun, Z., Lamy, K., Portafaix, T., and Gadouali, F.: Aerosol  
13 Distributions and Sahara Dust Transport in Southern Morocco, from Ground-Based and Satellite Observations, *Remote  
14 Sensing*, 14, 10.3390/rs14102454, 2022.

15 Bish, D. L. and Post, J. E.: Quantitative mineralogical analysis using the Rietveld full-pattern fitting method, *American  
16 Mineralogist*, 78, 1993.

17 Brem, B., Gysel, M., and Gysel-Beer, M.: EMEP, CREATE, ACTRIS, GAW-WDCA, 2020-2023, Particle number size  
18 distribution at Jungfraujoch, EBAS at NILU [dataset], 10.48597/MNVM-38BX, 2023.

19 Brennan, K. P. and Wilhelm, L.: Saharan dust linked to European hail events, *Atmospheric Chemistry and Physics*, 25, 10823–  
20 10836, 10.5194/acp-25-10823-2025, 2025.

21 Bukowiecki, N., Weingartner, E., Gysel, M., Coen, M. C., Zieger, P., Herrmann, E., Steinbacher, M., Gäggeler, H. W., and  
22 Baltensperger, U.: A Review of More than 20 Years of Aerosol Observation at the High Altitude Research Station  
23 Jungfraujoch, Switzerland (3580 m asl), *Aerosol and Air Quality Research*, 16, 764–788, 10.4209/aaqr.2015.05.0305, 2016.

24 Buseck, P. R. and Pösfai, M.: Airborne minerals and related aerosol particles: Effects on climate and the environment,  
25 *Proceedings of the National Academy of Sciences of the United States of America*, 96, 10.1073/pnas.96.7.3372, 1999.

26 Caquigneau, S., Gaudichet, A., Gomes, L., Magonthier, M. C., and Chatenet, B.: Saharan dust: Clay ratio as a relevant tracer to  
27 assess the origin of soil-derived aerosols, *Geophysical Research Letters*, 25, 983–986, 10.1029/98GL00569, 1998.

28 Cheng, Y.-S., Yeh, H.-C., and Allen, M. D.: Dynamic Shape Factor of a Plate-Like Particle, *Aerosol Science and Technology*,  
29 8, 109–123, 10.1080/02786828808959176, 1988.

30 Chester, R. and Johnson, L. R.: Atmospheric dusts collected off the Atlantic coasts of North Africa and the Iberian Peninsula,  
31 *Marine Geology*, 11, 251–260, 10.1016/0025-3227(71)90027-2, 1971.

32 Chou, C., Stetzer, O., Weingartner, E., Jurányi, Z., Kanji, Z. A., and Lohmann, U.: Ice nuclei properties within a Saharan dust  
33 event at the Jungfraujoch in the Swiss Alps, *Atmospheric Chemistry and Physics*, 11, 4725–4738, 10.5194/acp-11-4725-2011,  
34 2011.

35 Coen, M. C., Weingartner, E., Schaub, D., Hueglin, C., Corrigan, C., Henning, S., Schwikowski, M., and Baltensperger, U.:  
36 Saharan dust events at the Jungfraujoch: detection by wavelength dependence of the single scattering albedo and first  
37 climatology analysis, *Atmospheric Chemistry and Physics*, 4, 2465–2480, 10.5194/acp-4-2465-2004, 2004.

38 Collaud Coen, M., Brem, B. T., Gysel-Beer, M., Modini, R., Henne, S., Steinbacher, M., Putero, D., Gini, M. I., and  
39 Eleftheriadis, K., 10.5194/egusphere-2025-4162, 2025.

40 Cozic, J., Verheggen, B., Weingartner, E., Crosier, J., Bower, K. N., Flynn, M., Coe, H., Henning, S., Steinbacher, M., Henne,  
41 S., Collaud Coen, M., Petzold, A., and Baltensperger, U.: Chemical composition of free tropospheric aerosol for PM1 and  
42 coarse mode at the high alpine site Jungfraujoch, *Atmospheric Chemistry and Physics*, 8, 407–423, 10.5194/acp-8-407-2008,  
43 2008.

44 Cuevas-Agulló, E., Barriopedro, D., García, R. D., Alonso-Pérez, S., González-Alemán, J. J., Werner, E., Suárez, D., Bustos,  
45 J. J., García-Castrillo, G., García, O., Barreto, A., and Basart, S.: Sharp increase in Saharan dust intrusions over the western  
46 Euro-Mediterranean in February–March 2020–2022 and associated atmospheric circulation, *Atmospheric Chemistry and  
47 Physics*, 24, 4083–4104, 10.5194/acp-24-4083-2024, 2024.

Formatted: Justified, Indent: Left: 0"

Formatted: No bullets or numbering

Formatted: Left: 0.63", Section start: New page,  
Numbering: Continuous

18 DeCarlo, P. F., Slowik, J. G., Worsnop, D. R., Davidovits, P., and Jimenez, J. L.: Particle Morphology and Density  
19 Characterization by Combined Mobility and Aerodynamic Diameter Measurements. Part 1: Theory, *Aerosol Science and*  
20 *Technology*, 38, 1185–1205, 10.1080/027868290903907, 2004.

21 Denjean, C., Cassola, F., Mazzino, A., Triquet, S., Chevaillier, S., Grand, N., Bourriane, T., Momboisse, G., Sellegri, K.,  
22 Schwarzenbock, A., Freney, E., Mallet, M., and Formenti, P.: Size distribution and optical properties of mineral dust aerosols  
23 transported in the western Mediterranean, *Atmospheric Chemistry and Physics*, 16, 1081–1104, 10.5194/acp-16-1081-2016,  
24 2016.

25 Diaz-Hernandez, J. L. and Sanchez-Navas, A.: Saharan dust outbreaks and iberulite episodes, *Journal of Geophysical*  
26 *Research*, 121, 10.1002/2016JD024913, 2016.

27 Diaz-Hernández, J. L. and Párraga, J.: The nature and tropospheric formation of iberulites: Pinkish mineral microspherulites,  
28 *Geochimica et Cosmochimica Acta*, 72, 3883–3906, 10.1016/j.gca.2008.05.037, 2008.

29 Dollase, W. A.: Correction of intensities for preferred orientation in powder diffractometry: application of the March model,  
30 *Journal of Applied Crystallography*, 19, 267–272, 10.1107/s0021889886089458, 1986.

31 Draxler, R. R. and Rolph, G. D.: HYSPLIT (HYbrid Single-Particle Lagrangian Integrated Trajectory), NOAA Air Resources  
32 Laboratory, College Park, MD, 2003.

33 Dubovik, O., Sinyuk, A., Lapyonok, T., Holben, B. N., Mishchenko, M., Yang, P., Eck, T. F., Volten, H., Muñoz, O.,  
34 Veihelmann, B., van der Zande, W. J., Leon, J. F., Sorokin, M., and Slutsker, I.: Application of spheroid models to account for  
35 aerosol particle nonsphericity in remote sensing of desert dust, *Journal of Geophysical Research: Atmospheres*, 111,  
36 10.1029/2005jd006619, 2006.

37 Feng, I. Y., Gill, T. E., Van Pelt, R. S., Webb, N. P., and Tong, D. Q.: Economic costs of wind erosion in the United States,  
38 *Nature Sustainability*, 8, 307–314, 10.1038/s41893-024-01506-4, 2025.

39 Feng, J.: A 3-mode parameterization of below-cloud scavenging of aerosols for use in atmospheric dispersion models,  
40 *Atmospheric Environment*, 41, 6808–6822, 10.1016/j.atmosenv.2007.04.046, 2007.

41 Fischer, A. and Hüglin, C.: Partikelmessungen im NABEL, Messbericht 2024, Empa, Abteilung  
42 Luftfremdstoffe/Umwelttechnik, Dübendorf, 2024.

43 Flentje, H., Briel, B., Beck, C., Collaud Coen, M., Fricke, M., Cyrys, J., Gu, J., Pitz, M., and Thomas, W.: Identification and  
44 monitoring of Saharan dust: An inventory representative for south Germany since 1997, *Atmospheric Environment*, 109, 87–  
45 96, 10.1016/j.atmosenv.2015.02.023, 2015.

46 Francis, D., Eayrs, C., Chaboureaud, J. P., Mote, T., and Holland, D. M.: Polar Jet Associated Circulation Triggered a Saharan  
47 Cyclone and Derived the Poleward Transport of the African Dust Generated by the Cyclone, *Journal of Geophysical Research:*  
48 *Atmospheres*, 123, 10.1029/2018jd029095, 2018.

49 Francis, D., Fonseca, R., Nelli, N., Bozkurt, D., Picard, G., and Guan, B.: Atmospheric rivers drive exceptional Saharan dust  
50 transport towards Europe, *Atmospheric Research*, 266, 10.1016/j.atmosres.2021.105959, 2022.

51 Fujiyoshi, Y.: Melting Snowflakes, *Journal of the Atmospheric Sciences*, 43, 307–311, 10.1175/1520-  
52 0469(1986)043<0307:MS>2.0.CO;2, 1986.

53 Fussell, J. C. and Kelly, F. J.: Mechanisms underlying the health effects of desert sand dust, *Environment International*, 157,  
54 <http://dx.doi.org/10.60910/4x9t-ghuu>, 2021.

55 Grousset, F. E., Rognon, P., Coudé-Gaussen, G., and Pédemay, P.: Origins of peri-Saharan dust deposits traced by their Nd and  
56 Sr isotopic composition, *Palaeogeography, Palaeoclimatology, Palaeoecology*, 93, 203–212, 10.1016/0031-0182(92)90097-O,  
57 1992.

58 Haerig, M., Ansmann, A., Engelmann, R., Baars, H., Toledano, C., Torres, B., Althausen, D., Radenz, M., and Wandinger, U.:  
59 First triple-wavelength lidar observations of depolarization and extinction-to-backscatter ratios of Saharan dust, *Atmospheric*  
60 *Chemistry and Physics*, 22, 355–369, 10.5194/acp-22-355-2022, 2022.

61 Hashino, T., Cheng, K. Y., Chueh, C. C., and Wang, P. K.: Numerical study of motion and stability of falling columnar  
62 crystals, *Journal of the Atmospheric Sciences*, 73, 1923–1942, 10.1175/JAS-D-15-0219.1, 2016.

Deleted: <http://dx.doi.org/10.60910/4x9t-ghuu>.

34 Heald, C. L., Ridley, D. A., Kroll, J. H., Barrett, S. R. H., Cady-Pereira, K. E., Alvarado, M. J., and Holmes, C. D.:  
35 Contrasting the direct radiative effect and direct radiative forcing of aerosols, *Atmospheric Chemistry and Physics*, 14, 5513–  
36 5527, 10.5194/acp-14-5513-2014, 2014.

37 Heymsfield, A. J., Bansemer, A., Poellot, M. R., and Wood, N.: Observations of ice microphysics through the melting layer,  
38 *Journal of the Atmospheric Sciences*, 72, 2902–2928, 10.1175/JAS-D-14-0363.1, 2015.

39 Hinds, W. C.: *Aerosol Technology*, John Wiley and Sons, New York 1999.

40 Hüglin, C., Grange S.K.: *Chemical characterisation and source identification of PM10 and PM2.5 in Switzerland*, EMPA,  
41 Dübendorf, EMPA, Dübendorf, 2021.

42 Iskandar, F., Chang, H., and Okuyama, K.: Preparation of microencapsulated powders by an aerosol spray method and their  
43 optical properties, *Advanced Powder Technology*, 14, 349–367, 10.1163/15685520360685983, 2003.

44 Jones, N. R., de Jersey, A. M., Lavers, J. L., Rodemann, T., and Rivers-Auty, J.: Identifying laboratory sources of microplastic  
45 and nanoplastic contamination from the air, water, and consumables, *J Hazard Mater*, 465, 133276,  
46 10.1016/j.jhazmat.2023.133276, 2024.

47 Jurányi, Z., Gysel, M., Weingartner, E., Bukowiecki, N., Kammermann, L., and Baltensperger, U.: A 17 month climatology of  
48 the cloud condensation nuclei number concentration at the high alpine site Jungfraujoch, *Journal of Geophysical Research*,  
49 116, 10.1029/2010jd015199, 2011.

50 Kajikawa, M.: Observations of the Falling Motion of Plate-Like Snow Crystals Part I: The Free-Fall Patterns and Velocity,  
51 *Journal of the Meteorological Society of Japan. Ser. II*, 70, 1–9, 10.2151/jmsj1965.70.1\_1, 1992.

52 Kandler, K., Schneiders, K., Ebert, M., Hartmann, M., Weinbruch, S., Prass, M., and Pöhlker, C.: Composition and mixing  
53 state of atmospheric aerosols determined by electron microscopy: Method development and application to aged Saharan dust  
54 deposition in the Caribbean boundary layer, *Atmospheric Chemistry and Physics*, 18, 13429–13455, 10.5194/acp-18-13429-  
55 2018, 2018.

56 Kandler, K., Benker, N., Bundke, U., Cuevas, E., Ebert, M., Knippertz, P., Rodríguez, S., Schütz, L., and Weinbruch, S.:  
57 Chemical composition and complex refractive index of Saharan Mineral Dust at Izaña, Tenerife (Spain) derived by electron  
58 microscopy, *Atmospheric Environment*, 41, 8058–8074, 10.1016/j.atmosenv.2007.06.047, 2007.

59 Kearsley, A. T., Burchell, M. J., Hörz, F., Cole, M. J., and Schwandt, C. S.: Laboratory simulation of impacts on aluminum  
60 foils of the Stardust spacecraft: Calibration of dust particle size from comet Wild-2, *Meteoritics & Planetary Science*, 41, 167–  
61 180, 10.1111/j.1945-5100.2006.tb00201.x, 2010.

62 Kellogg, C. A. and Griffin, D. W.: Aerobiology and the global transport of desert dust, *Trends Ecol Evol*, 21, 638–644,  
63 10.1016/j.tree.2006.07.004, 2006.

64 Knight, C. A.: Observations of the morphology of melting snow, *Journal of Atmospheric Sciences*, 1123–1113o, 1979.

65 Kyrö, E.-M., Grönholm, T., Vuollekoski, H., Virkkula, A., Kulmala, M., Laakso, L., and Kyrö, E.: Snow scavenging of  
66 ultrafine particles: field measurements and parameterization, *Boreal Environment Research*, 14, 11,  
67 <http://dx.doi.org/10.60910/4x9t-ghuu>, 2009.

68 Leinonen, J. and Lerber, A. v.: Snowflake Melting Simulation Using Smoothed Particle Hydrodynamics, *Journal of*  
69 *Geophysical Research: Atmospheres*, 123, 1811–1825, 10.1002/2017JD027909, 2018.

70 Li, T., Cohen, A. J., Krzyzanowski, M., Zhang, C., Gumy, S., Mudu, P., Pant, P., Liu, Q., Kan, H., Tong, S., Chen, S., Kang,  
71 U., Basart, S., Toure, N. E., Al-Hemoud, A., Rudich, Y., Tobias, A., Querol, X., Khamsi, K., Samara, F., Hashizume, M.,  
72 Stafoggia, M., Malkawi, M., Wang, S., Zhou, M., Shi, X., Jiang, G., and Shen, H.: Sand and dust storms: a growing global  
73 health threat calls for international health studies to support policy action, *Lancet Planet Health*, 9, e34–e40, 10.1016/S2542-  
74 5196(24)00308-5, 2025.

75 Lian, L., Huang, J., Chen, S., Du, S., Zhang, L., and Yang, J.: A Comprehensive Review of Dust Events: Characteristics,  
76 Climate Feedbacks, and Public Health Risks, *Current Pollution Reports*, 11, 10.1007/s40726-025-00347-9, 2025.

77 Marticorena, B., Bergametti, G., Aumont, B., Callot, Y., N'Doumé, C., and Legrand, M.: Modeling the atmospheric dust cycle  
78 2. Simulation of Saharan dust sources, *Journal of Geophysical Research Atmospheres*, 102, 10.1029/96jd02964, 1997.

79 Matsuo, T. and Sasyo, Y.: Melting of Snowflakes below Freezing Level in the Atmosphere, *Journal of the Meteorological*  
80 *Society of Japan. Ser. II*, 59, 10–25, 10.2151/jmsj1965.59.1\_10, 1981.

Deleted: February 2021: A dusty month for Europe:  
[/blogs.egu.eu/divisions/as/2021/04/03/february-2021-a-dusty-month-for-europe/](https://blogs.egu.eu/divisions/as/2021/04/03/february-2021-a-dusty-month-for-europe/), last

Deleted: <http://dx.doi.org/10.60910/4x9t-ghuu>

15 Matzenauer, E.: Tectonics of the Préalpes Klippen and the subalpine molasse (canton Fribourg, Switzerland) *Geofocus*, 31, |  
16 doi.org/10.1080/17445647.2025.2509914, 2011.

17 Mauro, B. D., Garzonio, R., Rossini, M., Filippa, G., Pogliotti, P., Galvagno, M., Cella, U. M. D., Migliavacca, M., Baccolo, |  
18 G., Clemenza, M., Delmonte, B., Maggi, V., Dumont, M., Tuzet, F., Lafaysse, M., Morin, S., Cremonese, E., and Colombo,  
19 R.: Saharan dust events in the European Alps: Role in snowmelt and geochemical characterization, *Cryosphere*, 13, 1147–  
20 1165, 10.5194/tc-13-1147-2019, 2019.

21 McCorquodale, M. W. and Westbrook, C. D.: TRAIL: A novel approach for studying the aerodynamics of ice particles, |  
22 *Quarterly Journal of the Royal Meteorological Society*, 147, 589–604, 10.1002/qj.3935, 2021.

23 McFarquhar, G. M., Timlin, M. S., Rauber, R. M., Jewett, B. F., Grim, J. A., and Jorgensen, D. P.: Vertical Variability of Cloud |  
24 Hydrometeors in the Stratiform Region of Mesoscale Convective Systems and Bow Echoes, *Monthly Weather Review*, 135,  
25 3405–3428, 10.1175/MWR3444.1, 2007.

26 Meibodi, A. E., Abdoli, G., Taklif, A., and Morshedi, B.: Economic Modeling of the Regional Policies to Combat Dust |  
27 Phenomenon by Using Game Theory, *Procedia Economics and Finance*, 24, 409–418, 10.1016/s2212-5671(15)00697-8, 2015.

28 Meier, M. F., Mildnerberger, T., Locher, R., Rausch, J., Zünd, T., Neururer, C., Ruckstuhl, A., and Grobety, B.: A model based |  
29 two-stage classifier for airborne particles analyzed with Computer Controlled Scanning Electron Microscopy, *Journal of*  
30 *Aerosol Science*, 123, 1–16, 10.1016/j.jaerosci.2018.05.012, 2018.

31 Middleton, N. J.: Desert dust hazards: A global review, *Aeolian Research*, 24, 53–63, 10.1016/j.aeolia.2016.12.001, 2017.

32 Miller, N. L. and Wang, P. K.: Theoretical determination of the efficiency of aerosol particle collection by falling columnar ice |  
33 crystals, *J. ATMOS. SCI.*, 46, 1656–1663, 10.1175/1520-0469(1989)046<1656:TDOTE0>2.0.CO;2, 1989.

34 Nemuc, A., Vasilescu, J., Talianu, C., Belegante, L., and Nicolae, D.: Assessment of aerosol's mass concentrations from |  
35 measured linear particle depolarization ratio (vertically resolved) and simulations, *Atmospheric Measurement Techniques*, 6,  
36 3243–3255, 10.5194/amt-6-3243-2013, 2013.

37 Nessler, R., Bukowiecki, N., Henning, S., Weingartner, E., Calpini, B., and Baltensperger, U.: Simultaneous dry and ambient |  
38 measurements of aerosol size distributions at the Jungfraujoch, *Tellus B: Chemical and Physical Meteorology*, 55,  
39 10.3402/tellusb.v55i3.16371, 2003.

40 Oraltay, R. G. and Hallett, J.: The Melting Layer: A Laboratory Investigation of Ice Particle Melt and Evaporation near 0°C, |  
41 *Journal of Applied Meteorology and Climatology*, 44, 206–220, 10.1175/jam2194.1, 2005.

42 Panta, A., Kandler, K., Alastuey, A., González-Flórez, C., González-Romero, A., Klose, M., Querol, X., Reche, C., Yus-Diez, |  
43 J., and Pérez García-Pando, C.: Insights into the single-particle composition, size, mixing state, and aspect ratio of freshly  
44 emitted mineral dust from field measurements in the Moroccan Sahara using electron microscopy, *Atmospheric Chemistry*  
45 *and Physics*, 23, 3861–3885, 10.5194/acp-23-3861-2023, 2023.

46 Paquet, G., Rognon, P., Coude-Gaussen G., Wendling R.: Etude minéralogique de poussières sahariennes le long d'un itinéraire  
47 entre 19° et 35° de latitude nord. *Revue de géologie dynamique et de géographie physique*, 25, 257–265, 1984.

48 Paramonov, M., Grönholm, T., and Virkkula, A.: Below-cloud scavenging of aerosol particles by snow at an urban site in  
49 Finland, *Boreal Environment Research*, 16304 - 320, 10.60910/xjh7-9m7h, 2011.

50 Párraga, J., Martín-García, J. M., Delgado, G., Molinero-García, A., Cervera-Mata, A., Guerra, I., Fernández-González, M. V.,  
51 Martín-Rodríguez, F. J., Lyamani, H., Casquero-Vera, J. A., Valenzuela, A., Olmo, F. J., and Delgado, R.: Intrusions of dust  
52 and iberulites in Granada basin (Southern Iberian Peninsula). Genesis and formation of atmospheric iberulites, *Atmospheric*  
53 *Research*, 248, 10.1016/j.atmosres.2020.105260, 2021.

54 Pouchou, J. L. and Pichoir, F.: PAP  $\sigma$ (pZ) procedure for improved quantitative microanalysis, in: *Microbeam Analysis*, edited  
55 by: Armstrong, J. T., San Francisco Press, 103–106, 1985.

56 Proestakis, E., Papachristopoulou, K., Georgiou, T., Chatoutsidou, S. E., Lazaridis, M., Gkikas, A., Fountoulakis, I., Tsikoudi,  
57 I., Petrakis, M. P., and Amiridis, V.: Atmospheric dust and air quality over large-cities and megacities of the world,  
58 *Atmospheric Chemistry and Physics*, 25, 14777–14823, 10.5194/acp-25-14777-2025, 2025.

59 Rautela, K. S., Singh, S., and Goyal, M. K.: Characterizing the spatio-temporal distribution, detection, and prediction of  
60 aerosol atmospheric rivers on a global scale, *J Environ Manage*, 351, 119675, 10.1016/j.jenvman.2023.119675, 2024.

Deleted: ¶

Deleted: 6

Deleted: fin6

Deleted: ø

Deleted: ø

Formatted: Font: (Default) Times New Roman, Not Bold

37 Rolph, G., Stein, A., and Stunder, B.: Real-time Environmental Applications and Display sYstem: READY, Environmental  
38 Modelling and Software, 95, 210–228, 10.1016/j.envsoft.2017.06.025, 2017.

39 Santachiara, G., Prodi, F., Belosi, F., and Nicosia, A.: A Review of Thermo- and Diffusio-Phoresis in the Atmospheric Aerosol  
40 Scavenging Process. Part 2: Ice Crystal and Snow Scavenging, Atmospheric and Climate Sciences, 13, 466–477,  
41 10.4236/acs.2023.134026, 2023.

42 Santos, D., Mauricio, A. C., Sencadas, V., Santos, J. D., Fernandes, M. H., and Gomes, P. S.: Spray Drying: An Overview, in:  
43 Biomaterials - Physics and Chemistry - New Edition, InTech, 2018.

44 Schepanski, K., Tegen, I., Todd, M. C., Heinold, B., Bönisch, G., Laurent, B., and Macke, A.: Meteorological processes  
45 forcing Saharan dust emission inferred from MSG-SEVIRI observations of subdaily dust source activation and numerical  
46 models, Journal of Geophysical Research: Atmospheres, 114, 10.1029/2008jd010325, 2009.

47 Scheuvens, D., Schütz, L., Kandler, K., Ebert, M., and Weinbruch, S.: Bulk composition of northern African dust and its  
48 source sediments - A compilation, 2013.

49 Schmetz, J., Pili, P., Tjemkes, S., Just, D., Kerkmann, J., Rota, S., and Ratier, A.: An Introduction to Meteosat Second  
50 Generation (MSG), Bulletin of the American Meteorological Society, 83, 977–992, 10.1175/BAMS-83-7-Schmetz-2, 2002.

51 Schwikowski, M., Seibert, P., Baltensperger, U., and Gaggeler, H. W.: A study of an outstanding Saharan dust event at the  
52 high-alpine site Jungfraujoch, Switzerland, Atmospheric Environment, 29, 1829–1842, 10.1016/1352-2310(95)00060-c, 1995.

53 Sokolik, I. N.: The spectral radiative signature of wind-blown mineral dust: Implications for remote sensing in the thermal IR  
54 region, Geophysical Research Letters, 29, 10.1029/2002gl015910, 2002.

55 Stringham, G. E., Simons, D. B., and Guy, H. P.: The behavior of large particles falling in quiescent liquids, 10.3133/pp562C,  
56 1969.

57 Tagliavini, G., McCorquodale, M., Westbrook, C., Corso, P., Krol, Q., Holzner, M., Tagliavini, G., McCorquodale, M.,  
58 Westbrook, C., Corso, P., and Krol, Q.: Drag coefficient prediction of complex-shaped snow particles falling in air beyond the  
59 Stokes regime Rights / license: Creative Commons Attribution-NonCommercial-NoDerivatives 4.0 International International  
60 Journal of Multiphase Flow Drag coefficient prediction of complex-shaped snow particles falling in air beyond the Stokes  
61 regime, International Journal of Multiphase Flow, 140, 103652, 10.3929/ethz-b-000480012, 2021.

62 Tan, F., Zhang, H., Xia, K., Jing, B., Li, X., Tong, S., and Ge, M.: Hygroscopic behavior and aerosol chemistry of atmospheric  
63 particles containing organic acids and inorganic salts, npj Climate and Atmospheric Science, 7, 10.1038/s41612-024-00752-9,  
64 2024.

65 Tobias, A., Karanasiou, A., Amato, F., Roqué, M., and Querol, X.: Health effects of desert dust and sand storms: A systematic  
66 review and meta-analysis protocol, 2019.

67 UNCCD: Sand and Dust Storms Compendium Bonn, 2022.

68 Velasco-Merino, C., Mateos, D., Toledano, C., Prospero, J. M., Molinie, J., Euphrasie-Clotilde, L., González, R., Cachorro, V.  
69 E., Calle, A., and de Frutos, A. M.: Impact of long-range transport over the Atlantic Ocean on Saharan dust optical and  
70 microphysical properties based on AERONET data, Atmospheric Chemistry and Physics, 18, 9411–9424, 10.5194/acp-18-  
71 9411-2018, 2018.

72 Wang, Q., Gu, J., and Wang, X.: The impact of Sahara dust on air quality and public health in European countries,  
73 Atmospheric Environment, 241, 10.1016/j.atmosenv.2020.117771, 2020.

74 Weinbruch, S., Wentzel, M., Kluckner, M., Hoffmann, P., and Ortner, H. M.: Mikrochimica Acta Characterization of  
75 Individual Atmospheric Particles by Element Mapping in Electron Probe Microanalysis\*, 137–141, 1997.

76 Weinzierl, B., Sauer, D., Esselborn, M., Petzold, A., Veira, A., Rose, M., Mund, S., Wirth, M., Ansmann, A., Tesche, M.,  
77 Gross, S., and Freudenthaler, V.: Microphysical and optical properties of dust and tropical biomass burning  
78 aerosol layers in the Cape Verde region—an overview of the airborne in situ  
79 and lidar measurements during SAMUM-2, Tellus B: Chemical and Physical Meteorology, 63, 10.1111/j.1600-  
80 0889.2011.00566.x, 2011.

81 Weinzierl, B., Ansmann, A., Prospero, J. M., Althausen, D., Benker, N., Chouza, F., Dollner, M., Farrell, D., Fomba, W. K.,  
82 Freudenthaler, V., Gasteiger, J., Groß, S., Haarig, M., Heinold, B., Kandler, K., Kristensen, T. B., Mayol-Bracero, O. L.,  
83 Müller, T., Reitebuch, O., Sauer, D., Schäfler, A., Schepanski, K., Spanu, A., Tegen, I., Toledano, C., and Walser, A.: The

Formatted: Space After: 0 pt, No bullets or numbering

Formatted: No bullets or numbering

14 Saharan Aerosol Long-Range Transport and Aerosol–Cloud-Interaction Experiment: Overview and Selected Highlights,  
15 *Bulletin of the American Meteorological Society*, 98, 1427–1451, 10.1175/bams-d-15-00142.1, 2017.  
16 Wiedensohler, A., Birmili, W., Nowak, A., Sonntag, A., Weinhold, K., Merkel, M., Wehner, B., Tuch, T., Pfeifer, S., Fiebig,  
17 M., Fjåraa, A. M., Asmi, E., Sellegri, K., Depuy, R., Venzac, H., Villani, P., Laj, P., Aalto, P., Ogren, J. A., Swietlicki, E.,  
18 Williams, P., Roldin, P., Quincey, P., Hüglin, C., Fierz-Schmidhauser, R., Gysel, M., Weingartner, E., Riccobono, F., Santos,  
19 S., Gruning, C., Faloon, K., Beddows, D., Harrison, R., Monahan, C., Jennings, S. G., O'Dowd, C. D., Marinoni, A., Horn, H.  
20 G., Keck, L., Jiang, J., Scheckman, J., McMurry, P. H., Deng, Z., Zhao, C. S., Moerman, M., Henzing, B., de Leeuw, G.,  
21 Löschan, G., and Bastian, S.: Mobility particle size spectrometers: harmonization of technical standards and data structure to  
22 facilitate high quality long-term observations of atmospheric particle number size distributions, *Atmospheric Measurement*  
23 *Techniques*, 5, 657–685, 10.5194/amt-5-657-2012, 2012.

54
